# Supplementary material for: Outcomes of an integrated knowledge translation approach in five African countries: A mixed methods comparative case study
Source: Research Square preprint supplement (doi:10.21203/rs.3.rs-4312132/v1), 2024-05-09
Supplement: Supplementary file 1 [file 58f9d0b6a0eea729446b08f5.xlsx]

## Sheet: Tool
1	Review or meta-analysis question		not applicable											NOTES
	ARTICLE CITATION
2	Study author, publication year		Sell, forthcoming
3	Study title		Outcomes of an Integrated Knowledge Translation Approach in five African Countries: A Comparative Case Study
	INTRODUCTION		Implementation strategy				Reported on page #	Intervention					Reported on page #
4	Rationale		dedicated training, time, staff and resources for IKT hypothesised to enable IKT implementation					Integrated knowledge translation (IKT) as a strategy to bridge the 'gap' between research, policy and practice; continuous engagement between decision-makers and researchers shown to lead to increased research utilisation in other contexts						Described in detail in the protocol: Pfadenhauer et al. 2021: https://doi.org/10.1186/s12961-020-00675-w and in the intervention description: Sell et al. 2023: https://doi.org/10.1186/s12961-023-01038-x (using the TIDieR checklist)
5	Aim(s), objective(s), or research question(s)	Primary	establishing a formal IKT approach in the project and developing IKT expertise among CEBHA+ researchers					Which proximal, intermediate and final outcomes are linked to the IKT approach?
		Secondary						Testing and advancing the initial programme theory; relevance of different contextual factors
	METHODS: DESCRIPTION						Reported on page #						Reported on page #
6	Descriptions		Development of an overarching IKT approach and local IKT strategies, IKT training & guidance, continuous implementation support					Core components: Ongoing engagement between researchers and stakeholders; IKT activities tailored to prioritised stakeholders						intervention and implementation described in detail here https://doi.org/10.1186/s12961-023-01038-x
7	Adaptation		Updating and monitoring of IKT strategies variable					some engagement aims, fora and media adapted due to COVID-19 pandemic
8	Design		longitudinal mixed-methods comparative case study employing an online survey, qualitative interviews, focus group discussions, and document analysis; two waves:2020, 2022; deviations from protocol: switched from in person to online interviews in March 2020; no decision-makers interviewed at second evaluation stage; researchers interviewed in focus groups at second evaluation stage; SRQR checklist…					longitudinal mixed-methods comparative case study employing an online survey, qualitative interviews, focus group discussions, and document analysis; two waves:2020, 2022; deviations from protocol: switched from in person to online interviews in March 2020; no decision-makers interviewed at second evaluation stage; researchers interviewed in focus groups at second evaluation stage; SRQR checklist…
9	Participant types		CEBHA+ researchers and their partners from policy and practice					CEBHA+ researchers and their partners from policy and practice
10	Comparison group		NA					NA
11	Context		CEBHA+ research collaboration funded by the German Ministry of Education and Research; varying KT and macro context at the implementing sites; more details published: https://doi.org/10.1186/s12961-023-01038-x					CEBHA+ research collaboration funded by the German Ministry of Education and Research; varying KT and macro context at the intervention sites; more details published: https://doi.org/10.1186/s12961-023-01038-x
12	Sites		nine academic institutions in six countries: Ethiopia, Germany, Malawi, Rwanda, South Africa, and Uganda; partner institutions include ministries, health authorities and agencies, and others					nine academic institutions in six countries: Ethiopia, Germany, Malawi, Rwanda, South Africa, and Uganda; partner institutions include ministries, health authorities and agencies, and others
13	Subgroups (optional)		researchers and decision-makers/stakeholders					researchers and decision-makers/stakeholders
14	Implementation phase		evaluation occured during and post-implementation					evaluation occured during and post-implementation
15	Process evaluation		How does IKT implementation work? (dose, fidelity and quality of the IKT strategies (Pfadenhauer 2021); examination of implementation outcomes & process)					How do intervention outcomes occur?
16	Sample size		all CEBHA+ researchers & priority stakeholders eligible for inclusion; given the small sample, no formal assessment for data saturation was planned					all CEBHA+ researchers & priority stakeholders eligible for inclusion; given the small sample, no sample size calculation was undertaken and no formal assessment for data saturation was planned
17	Analysis		qualitative content analysis, inductive and deductive coding in ATLAS.ti, coding frame review and feedback on analysis by co-evaluators from Ethiopia and Uganda					descriptive statistics of quantitative data; qualitative content analysis, inductive and deductive coding in ATLAS.ti, cross-case and within case comparison, coding frame review and feedback on analysis by co-evaluators from Ethiopia and Uganda
18	Sub-group analyses		cross-case and within case comparison					disaggregation by site and evaluation wave where feasible;
			Quantitative		Qualitative				Quantitative		Qualitative
19	Outcomes (assessment)	Acceptability	NA		IKT approach accepted by researchers and stakeholders?			Effectiveness	proximal outcomes: relationship-building, capacity-building and collaborative research; intermediate outcomes: knowledge and attitudes of researchers and decision-makers final outcome: production of contextualised, relevant research and consideration of contextualised research evidence in policy and practice decision-making
	(not all of these are required)	Appropriateness			IKT approach appropriate? Does it fit in local structures and routines?			Efficiency
		Adoption			IKT approach adopted, e.g. IKT strategies developed?			Equity
		Feasibility			IKT approach considered feasible?			Patientcenterdness
		Fidelity			Continuous engagement (IKT)? IKT strategies updated?			Safety
		Penetration			IKT 'vision' embraced by researchers?			Timeliness
		Cost			What are cost implications of the IKT approach?
		Sustainability			further projects incorporating IKT conducted? IKT taught at university? Infrastructure established?
	RESULTS: DESCRIPTION						Reported on page #							NOTES
			Quantitative		Qualitative				Quantitative		Qualitative
20	Outcomes (findings)	Acceptability	NA		analysis ongoing			Effectiveness
	(not all of these are required)	Appropriateness						Efficiency
		Adoption						Equity
		Feasibility						Patientcenterdness
		Fidelity						Safety
		Penetration						Timeliness
		Cost
		Sustainability
21	Barriers to implementation
22	Facilitators of implementation
	METHODS: EVALUATION	not applicable												NOTES
			Implementation strategy					Intervention
23	Design (Follow steps 1, 2, and 3)		Step 2: insert 5 corresponding criteria from instructions	Step 3: Provide score (0 or 1) to each criteria				Step 2: insert 5 corresponding criteria from instructions	Step 2 insert 5 corresponding criteria from instructions	Step 3: Provide score (0 or 1) to each criteria
	Step 1: Insert design type: Qualitative, Quantitative RCT, Quantitative non-randomized, or Mixed methods		insert criteria 1					insert criteria 1
			insert criteria 2					insert criteria 2
			insert criteria 3					insert criteria 3
			insert criteria 4					insert criteria 4
			insert criteria 5					insert criteria 5
	RESULTS: EVALUATION													NOTES
	Step 4: Sum the score from Step 3 and apply to the outcomes assessed		Bias (1-2=higher bias; 3-5=lower bias; U=unclear; NA=not assessed)		Step 4: Sum the score from Step 3 and apply to the outcomes assessed			Bias (1-2=higher bias; 3-5=lower bias; U=unclear; NA=not assessed)
24	Outcomes	Acceptability			Outcomes		Effectiveness
	(not all of these are required)	Appropriateness			(not all of these are required)		Efficiency
		Adoption					Equity
		Feasibility					Patientcenterdness
		Fidelity					Safety
		Penetration					Timeliness
		Cost
		Sustainability

## Sheet: Instructions
#	Item	Description	Explanation	Additional explanation	Source	Team decision-- rationale for choices?
1	Review or meta-analysis question	The overall question guiding the review or meta-analysis	We suggest using the PICO format (population, intervention, comparison, outcome)
	Notes	Use this space to write notes to yourself or other extractors regarding decisions on how to enter data
	Reported on page #	When used as a reporting tool, indicate the page number where the indicated information can be found
	ARTICLE CITATION
2	Study author, publication year	Indicate the study author name and publication year
3	Study title	Indicate the study title	Identification as an implementation study, and description of the methodology in the title and/or keywords
	INTRODUCTION
	Implementation strategy	“Implementation strategy” refers to how the intervention was implemented.	Clarify if they are reporting as an implementation study (i.e. they have an implementation aim). List any implementation strategy being evaluated, as defined as methods or techniques used to enhance the adoption, implementation, and sustainability of a program or practice	The primary focus of implementation science is the implementation strategy (column 1) and the expectation is that this will always be completed.	https://implementationscience.biomedcentral.com/articles/10.1186/s13012-015-0209-1; STARI
	Intervention strategy	“Intervention” refers to the healthcare or public health intervention that is being implemented.	A set of actions with a coherent objective based on a theoretical construct to bring about change or produce an identifiable outcome	The evidence about the impact of the intervention on the targeted population should always be considered (column 2) and either health outcomes reported or robust evidence cited to support a known beneficial effect of the intervention on the health of individuals or populations.	Rychetnik et al., 2004; STARI
4	Rationale	For implementation strategy: the scientific background and rationale for the implementation strategy (including any underpinning theory/framework/model, how it is expected to achieve its effects and any pilot work). For intervention: the scientific background and rationale for the intervention being implemented (including evidence about its effectiveness and how it is expected to achieve its effe…
5	Aim(s), objective(s), or research question(s)	Are there clear aims, objectives, or research questions? Indicate the primary (upon which the study was primarily designed to address) and the secondary (addressing this is prioritized after the primary)	The aims of the study, differentiating between implementation objectives and any intervention objectives.	Overall, we encourage cutting and pasting from the articles rather than paraphrasing	MMAT
	METHODS: DESCRIPTION
6	Descriptions	A description of the intervention and implementation strategy. Identify the components that are core components vs those that are tangential and modifiable for the context, if possible.			STARI
7	Adaptation	A description of any adaptation that has and/or will occur.	Fidelity to implementation strategy as planned and adaptation to suit context and preferences. Fidelity to delivering the core components of intervention (where measured)		FRAME / STARI
8	Design	The design and key features of the evaluation, (cross referencing to any appropriate methodology reporting standards) and any changes to study protocol, with reasons
9	Participant types	Who are the participants in the intervention and implementation strategy	For example, implementer, beneficiary, stakeholder		JBI
10	Comparison group	If experimental design, indicate the comparison group for the intervention and/or implementation strategy
11	Context	The context in which the intervention was implemented.	Consider social, economic, policy, healthcare, organisational barriers and facilitators that might influence implementation elsewhere		STARI
12	Sites	The characteristics of the targeted ‘site(s)’ (e.g locations/personnel/resources etc.) for implementation and any eligibility criteria.	The population targeted by the intervention and any eligibility criteria.		STARI
13	Subgroups (optional)	Any sub-groups recruited for additional research tasks, and/or nested studies are described	Do not penalize studies that don’t have subgroup analysis		STARI
14	Implementation phase	Indcate whether evaluation occurred pre-, during , and/or post-implementation
15	Process evaluation	Process evaluation objectives and outcomes related to the mechanism by which the strategy is expected to work
16	Sample size	Rationale for sample sizes (including sample size calculations, budgetary constraints, practical considerations, data saturation, as appropriate)
17	Analysis	Methods of analysis (with reasons for that choice)
18	Sub-group analyses	Any a priori sub-group analyses (e.g. between different sites in a multicentre study, different clinical or demographic populations), and sub-groups recruited to specific nested research tasks
19	Outcomes (assessment) (Implementation)	Identify and define pre-specified primary and other outcome(s) of the implementation, and how they were assessed. Document any pre-determined targets, but do not include the finding (as this will be reported below).			STARI
	Quantitative column	Input the specific outcome			MMAT
	Qualitative column	Input the specific outcome			MMAT
	Acceptability	the perception among implementation stakeholders (beneficiaries and implementers) that the innovation is agreeable, palatable, or satisfactory	level of analysis: consumer, provider;		Proctor et al., 2011
	Adoption	the intention, initial decision, or action to try or employ the innovation (i.e. uptake)	level of analysis: provider, organization/setting		Proctor et al., 2011
	Appropriateness	the perceived fit, relevance, or compatibility of the innovation for a given practice setting, provider, or beneficiary; and/or perceived fit of the innovation to address a particular issue or problem	level of analysis: consumer, provider, organization/setting		Proctor et al., 2011
	Feasibility	the extent to which the innovation can be successfully used or carried out within a given agency or setting	level of analysis: provider, organization/setting		Proctor et al., 2011
	Fidelity	degree to which the innovation can be implemented as it was prescribed in the original protocol or as it was intended by the program developer	level of analysis: provider		Proctor et al., 2011
	Cost	(incremental or implementation cost) is defined as the cost impact of an implementation effort	level of analysis: provider, organization		Proctor et al., 2011
	Penetration	the integration of a practice within a service setting and its subsystems	level of analysis: organization/setting		Proctor et al., 2011
	Sustainability	the extent to which a newly implemented innovation is maintained or institutionalized within a service setting’s ongoing, stable operations	level of analysis: administrators, organization/setting		Proctor et al., 2011
19	Outcomes (assessment) (Intervention)	Identify and define pre-specified primary and other outcome(s) of the intervention, and how they were assessed. Document any pre-determined targets, but do not include the finding (as this will be reported below).			STARI
	Quantitative column	Input the specific outcome			MMAT
	Qualitative column	Input the specific outcome			MMAT
	Effectiveness	provision of services based on scientific knowledge to all who could benefit and refraining from providing services to those not likely to benefit (avoiding underuse and overuse, respectively)	Was the primary/secondary outcome achieved?		Proctor et al., 2011
	Efficiency	the avoidance of waste, including waste of equipment, supplies, ideas, and energy			Proctor et al., 2011
	Equity	provision of care that does not vary in quality because of personal characteristics such as gender, ethnicity, geographic location, and socioeconomic status			Proctor et al., 2011
	Patientcenterdness	provision of care that is respectful of and responsive to individual patient preferences, needs, and values and ensuring that patient values guide all clinical decisions			Proctor et al., 2011
	Safety	the avoidance of injuries to patients from the care that is intended to help them			Proctor et al., 2011
	Timeliness	reduction of waits and sometimes harmful delays for both those who receive and those who give care			Proctor et al., 2011
	RESULTS: DESCRIPTION
20	Outcomes (findings) (Implementation)	Report the results/findings for the implementation outcomes included in this study			STARI
	Quantitative column	Input the specific outcome			MMAT
	Qualitative column	Input the specific outcome			MMAT
	Acceptability	the perception among implementation stakeholders (beneficiaries and implementers) that the innovation is agreeable, palatable, or satisfactory	level of analysis: consumer, provider;		Proctor et al., 2011
	Adoption	the intention, initial decision, or action to try or employ the innovation (i.e. uptake)	level of analysis: provider, organization/setting		Proctor et al., 2011
	Appropriateness	the perceived fit, relevance, or compatibility of the innovation for a given practice setting, provider, or beneficiary; and/or perceived fit of the innovation to address a particular issue or problem (OH prevention).	level of analysis: consumer, provider, organization/setting		Proctor et al., 2011
	Feasibility	the extent to which the innovation can be successfully used or carried out within a given agency or setting	level of analysis: provider, organization/setting		Proctor et al., 2011
	Fidelity	degree to which the innovation can be implemented as it was prescribed in the original protocol or as it was intended by the program developer	level of analysis: provider		Proctor et al., 2011
	Cost	(incremental or implementation cost) is defined as the cost impact of an implementation effort	level of analysis: provider, organization		Proctor et al., 2011
	Penetration	the integration of a practice within a service setting and its subsystems	level of analysis: organization/setting		Proctor et al., 2011
	Sustainability	the extent to which a newly implemented innovation is maintained or institutionalized within a service setting’s ongoing, stable operations	level of analysis: administrators, organization/setting		Proctor et al., 2011
20	Outcomes (findings) (Intervention)	Report the results/findings for the intervention outcomes included in this study			STARI
	Quantitative column	Input the specific outcome			MMAT
	Qualitative column	Input the specific outcome			MMAT
	Effectiveness	provision of services based on scientific knowledge to all who could benefit and refraining from providing services to those not likely to benefit (avoiding underuse and overuse, respectively)	Was the primary/secondary outcome achieved?		Proctor et al., 2011
	Efficiency	the avoidance of waste, including waste of equipment, supplies, ideas, and energy			Proctor et al., 2011
	Equity	provision of care that does not vary in quality because of personal characteristics such as gender, ethnicity, geographic location, and socioeconomic status			Proctor et al., 2011
	Patientcenterdness	provision of care that is respectful of and responsive to individual patient preferences, needs, and values and ensuring that patient values guide all clinical decisions			Proctor et al., 2011
	Safety	the avoidance of injuries to patients from the care that is intended to help them			Proctor et al., 2011
	Timeliness	reduction of waits and sometimes harmful delays for both those who receive and those who give care			Proctor et al., 2011
21	Barriers to implementation	Identify any factors examined that do or could challenge successful implementation
22	Facilitators of implementation	Identify any factors examined that do or could support successful implementation
	METHODS: EVALUATION
23	Design	Follow steps 1, 2, and 3
	Step 1	Insert design type: Qualitative, Quantitative RCT, Quantitative non-randomized, or Mixed methods
	Step 2	Step 2 insert 5 corresponding criteria from instructions
	Qualitative criteria	1.1. Is the qualitative approach appropriate to answer the research question?	The qualitative approach used in a study (see non-exhaustive list on the left side of this table) should be appropriate for the research question and problem. For example, the use of a grounded theory approach should address the development of a theory and ethnography should study human cultures and societies.	“Qualitative research is an approach for exploring and understanding the meaning individuals or groups ascribe to a social or human problem” (Creswell, 2013b, p. 3). Common qualitative research approaches include (this list if not exhaustive): Ethnography The aim of the study is to describe and interpret the shared cultural behaviour of a group of individuals. Phenomenology The study focuses on t…	MMAT
		1.2. Are the qualitative data collection methods adequate to address the research question?	This criterion is related to data collection method, including data sources (e.g., archives, documents), used to address the research question. To judge this criterion, consider whether the method of data collection (e.g., in depth interviews and/or group interviews, and/or observations) and the form of the data (e.g., tape recording, video material, diary, photo, and/or field notes) are adequate…	0=not present; 1=present; have to have 2 out 5 unclear for overall unclear	MMAT
		1.3. Are the findings adequately derived from the data?	This criterion is related to the data analysis used. Several data analysis methods have been developed and their use depends on the research question and qualitative approach. For example, open, axial and selective coding is often associated with grounded theory, and within- and cross-case analysis is often seen in case study.		MMAT
		1.4. Is the interpretation of results sufficiently substantiated by data?	The interpretation of results should be supported by the data collected. For example, the quotes provided to justify the themes should be adequate.		MMAT
		1.5. Is there coherence between qualitative data sources, collection, analysis and interpretation?	There should be clear links between data sources, collection, analysis and interpretation.		MMAT
	Quantitative, RCT criteria	2.1. Is randomization appropriately performed?	In a randomized controlled trial, the allocation of a participant (or a data collection unit, e.g., a school) into the intervention or control group is based solely on chance. Researchers should describe how the randomization schedule was generated. A simple statement such as ‘we randomly allocated’ or ‘using a randomized design’ is insufficient to judge if randomization was appropriately perform…	0	MMAT
		2.2. Are the groups comparable at baseline?	Baseline imbalance between groups suggests that there are problems with the randomization. Indicators from baseline imbalance include: “(1) unusually large differences between intervention group sizes; (2) a substantial excess in statistically significant differences in baseline characteristics than would be expected by chance alone; (3) imbalance in key prognostic factors (or baseline measures o…		MMAT
		2.3. Are there complete outcome data?	Almost all the participants contributed to almost all measures. There is no absolute and standard cut-off value for acceptable complete outcome data. Agree among your team what is considered complete outcome data in your field and apply this uniformly across all the included studies. For instance, in the literature, acceptable complete data value ranged from 80% (Thomas et al., 2004; Zaza et al.,…		MMAT
		2.4. Are outcome assessors blinded to the intervention provided?	Outcome assessors should be unaware of who is receiving which interventions. The assessors can be the participants if using participant reported outcome (e.g., pain), the intervention provider (e.g., clinical exam), or other persons not involved in the intervention (Higgins et al., 2016).		MMAT
		2.5 Did the participants adhere to the assigned intervention?	To judge this criterion, consider the proportion of participants who continued with their assigned intervention throughout follow-up. “Lack of adherence includes imperfect compliance, cessation of intervention, crossovers to the comparator intervention and switches to another active intervention.” (Higgins et al., 2016, p. 25).		MMAT	question: criteria?
	Quantitative, non-randomized criteria	3.1. Are the participants representative of the target population?	Indicators of representativeness include: clear description of the target population and of the sample (inclusion and exclusion criteria), reasons why certain eligible individuals chose not to participate, and any attempts to achieve a sample of participants that represents the target population.	Non-randomized studies are defined as any quantitative studies estimating the effectiveness of an intervention or studying other exposures that do not use randomization to allocate units to comparison groups (Higgins and Green, 2008). Common designs include (this list if not exhaustive): Non-randomized controlled trials The intervention is assigned by researchers, but there is no randomization, e…	MMAT
		3.2. Are measurements appropriate regarding both the outcome and intervention (or exposure)?	Indicators of appropriate measurements include: the variables are clearly defined and accurately measured; the measurements are justified and appropriate for answering the research question; the measurements reflect what they are supposed to measure; validated and reliability tested measures of the intervention/exposure and outcome of interest are used, or variables are measured using ‘gold stand…		MMAT
		3.3. Are there complete outcome data?	Almost all the participants contributed to almost all measures. There is no absolute and standard cut-off value for acceptable complete outcome data. Agree among your team what is considered complete outcome data in your field (and based on the targeted journal) and apply this uniformly across all the included studies. For example, in the literature, acceptable complete data value ranged from 80%…		MMAT
		3.4. Are the confounders accounted for in the design and analysis?	Confounders are factors that predict both the outcome of interest and the intervention received/exposure at baseline. They can distort the interpretation of findings and need to be considered in the design and analysis of a non-randomized study. Confounding bias is low if there is no confounding expected, or appropriate methods to control for confounders are used (such as stratification, regressi…		MMAT
		3.5. During the study period, is the intervention administered (or exposure occurred) as intended?	For intervention studies, consider whether the participants were treated in a way that is consistent with the planned intervention. Since the intervention is assigned by researchers, consider whether there was a presence of contamination (e.g., the control group may be indirectly exposed to the intervention) or whether unplanned co-interventions were present in one group (Sterne et al., 2016). Fo…		MMAT
	Mixed methods criteria	4.1. Is there an adequate rationale for using a mixed methods design to address the research question?	The reasons for conducting a mixed methods study should be clearly explained. Several reasons can be invoked such as to enhance or build upon qualitative findings with quantitative results and vice versa; to provide a comprehensive and complete understanding of a phenomenon or to develop and test instruments (Bryman, 2006).	Mixed methods (MM) research involves combining qualitative (QUAL) and quantitative (QUAN) methods. In this tool, to be considered MM, studies have to meet the following criteria (Creswell and Plano Clark, 2017): (a) at least one QUAL method and one QUAN method are combined; (b) each method is used rigorously in accordance to the generally accepted criteria in the area (or tradition) of research i…	MMAT
		4.2. Are the different components of the study effectively integrated to answer the research question?	Integration is a core component of mixed methods research and is defined as the “explicit interrelating of the quantitative and qualitative component in a mixed methods study” (Plano Clark and Ivankova, 2015, p. 40). Look for information on how qualitative and quantitative phases, results, and data were integrated (Pluye et al., 2018). For instance, how data gathered by both research methods was …		MMAT
		4.3. Are the outputs of the integration of qualitative and quantitative components adequately interpreted?	This criterion is related to meta-inference, which is defined as the overall interpretations derived from integrating qualitative and quantitative findings (Teddlie and Tashakkori, 2009). Meta-inference occurs during the interpretation of the findings from the integration of the qualitative and quantitative components, and shows the added value of conducting a mixed methods study rather than havi…		MMAT
		4.4. Are divergences and inconsistencies between quantitative and qualitative results adequately addressed?	When integrating the findings from the qualitative and quantitative components, divergences and inconsistencies (also called conflicts, contradictions, discordances, discrepancies, and dissonances) can be found. It is not sufficient to only report the divergences; they need to be explained. Different strategies to address the divergences have been suggested such as reconciliation, initiation, bra…		MMAT
		4.5. Do the different components of the study adhere to the quality criteria of each tradition of the methods involved?	The quality of the qualitative and quantitative components should be individually appraised to ensure that no important threats to trustworthiness are present. To appraise 5.5, use criteria for the qualitative component (1.1 to 1.5), and the appropriate criteria for the quantitative component (2.1 to 2.5, or 3.1 to 3.5, or 4.1 to 4.5). The quality of both components should be high for the mixed m…	need some additional guidance here	MMAT
	Step 3	Provide score (0 or 1) to each criteria where 1 indicates that the criteria was met and 0 indicates the criteria was not met
	RESULTS: EVALUATION
	Step 4	Sum the score from Step 3 and apply to the outcomes assessed
24	Outcomes
	Bias Column	Indicate the degree of bias based on the design and methods, where 1-2=higher bias and 3-5=lower bias. Can also input 'unclear' if the degree of bias cannot be determined, or 'NA' for outcomes not assessed
	Bias Column	Indicate the degree of bias based on the design and methods, where 1-3=high bias and 4-5=low bias. Can also input 'unclear' if the degree of bias cannot be determined.	This is a composite score based on methods description and evaluation.	include additional instructions for inputting	JBI?
	Support column	Input the support for the determination of bias, including the method used to assess that specific outcome			JBI?
