# Supplementary material for: Outcomes of an integrated knowledge translation approach in five African countries: A mixed methods comparative case study
Source: Research Square preprint supplement (doi:10.21203/rs.3.rs-4312132/v1), 2024-05-09
Supplement: Supplementary file 2 [file b0e3d0e47a66eb2c6deb6fce.xlsx]

## Sheet: Original
	Code	Comment	Code Groups
○	**CONTEXT NEEDED	code for quotations that need clarification from co-analysers and/or team discussion
○	*avoiding criticism/social desirability	* are meta codes use this code when the way the interviewee responds appears to be adapted to what they perceive the interviewer wants to hear (=social desirability) or when they are avoiding being critical, e.g. of the IKT intervention
○	*awkward question	* are meta codes Use this code to flag awkward questions that may then have elicited awkward or confused answers.
●	CNTXT: INDIVIDUAL	Main category: context Sub-category: macro Use the codes in this sub-category for quotations about individual-level contextual factors related to stakeholder engagement, e.g. aspects related to individuals' personality, attitudes, motivation, past experiences...	Contextual factors Contextual factors: individual
●	cntxt: individual: attitudes_"personality"	Category: contextual factors sub-category: individual / personal level code: personality code description: Use this code for quotations individual's personality as a contextual factor that may affect SH engagement. Use this code when interviewees explicitly use the term "personality" to describe why someone does or doesn't collaborate with researchers/decision-makers. do NOT use for: - contextual…	Contextual factors Contextual factors: individual
●	cntxt: individual: attitudes_hesitancy/suspicion/scepticism	Category: contextual factors sub-category: individual / personal level code: hesitancy/suspicion/scepticism code description: Use this code for quotations about (initial) distrust, scepticism, hesitancy or even suspicion of individuals about the research collaboration. Example: "So, I think people are alert for a good reason because you can easily use their time and the information for something …	Contextual factors Contextual factors: individual
●	cntxt: individual: attitudes_humility	Category: contextual factors sub-category: individual / personal level sub-sub-category: attitudes code: humility code description: Use this code for quotations when the way the interviewee talks about researcher-decision-maker interaction shows a sense of humility.	Contextual factors Contextual factors: individual
●	cntxt: individual: attitudes_interest in networking	Category: contextual factors sub-category: individual / personal level sub-sub-category: attitudes code: humility code description: Use this code for quotations indicated that the interviewee or someone they talk about has an interest in networking or enjoys networking.	Contextual factors Contextual factors: individual
●	cntxt: individual: attitudes_interest in research/EIDM	Category: contextual factors sub-category: individual / personal level sub-sub-category: attitudes code: interest in research/EIDM code description: Use this code for quotations indicating that someone (usually a decision-maker) has a particular interest in research and evidence and/or that he or she thinks decision-making shoulds be guided by evidence. Examples: "I don't shy away from the study"	Contextual factors Contextual factors: individual
●	cntxt: individual: attitudes_KT interest_no	Category: contextual factors sub-category: individual / personal level code: previous KT interest_no code description: Use this code for quotations indicating that an individual had no interest in IKT/KT before CEBHA+ started (researcher perspective).	Contextual factors Contextual factors: individual
●	cntxt: individual: attitudes_KT interest_yes	Category: contextual factors sub-category: individual / personal level code: previous KT interest_yes code description: Use this code for quotations about an individual's interest in IKT/KT prior to their involvement in the CEBHA+ project (researcher perspective).	Contextual factors Contextual factors: individual
●	cntxt: individual: attitudes_research is often useless/lands on a shelf	Category: contextual factors sub-category: individual / personal level sub-sub-category: attitudes code: research is often useless/lands on a shelf code description: Use this code for quotations indicating that the interviewee or someone they talk about thinks research is useless, not worth the time or typically lands on a shelf.	Contextual factors Contextual factors: individual
●	cntxt: individual: attitudes_separate worlds	Category: contextual factors sub-category: individual / personal level sub-sub-category: attitudes code: separate worlds code description: Use this code for quotations about an individual's perception that researchers and those who work in policy or practice operate in different worlds, that work differently, and/or that there are (presumably) different mindsets and ways of working in research vs…	Contextual factors Contextual factors: individual
●	cntxt: individual: DM expectations	Category: contextual factors sub-category: individual / personal level code: DM expectations Code description: Use this code for quotations about the decision-maker's expectations that they bring to the partnership as an individual-level factor that may affect stakeholder engagement. Use this code for expectations that are not related to the decisionmaker's motivation or incentives for joining th…	Contextual factors Contextual factors: individual
●	cntxt: individual: experience with SH eng._no	Category: contextual factors sub-category: individual / personal level code: past experience: none Code description: Use this code for quotations indicating that the interviewee does not have any past experience with SH engagement or that they have had very little exposure to stakeholder engagement thus far. E.g. they have never had to work with people from other fields, from policy, or from prac…	Contextual factors Contextual factors: individual
●	cntxt: individual: experience with SH eng._yes_bad	Category: contextual factors sub-category: individual / personal level code: past experience: bad code description: Use this code for quotations about an individual's bad experiences with stakeholder engagement as a relevant contextual factor that may affect SH engagement. E.g. past experience of stakeholders experiencing that researchers were not sharing their work. Or past experience of researc…	Contextual factors Contextual factors: individual
●	cntxt: individual: experience with SH eng._yes_good	Category: contextual factors sub-category: individual / personal level code: past experience: good Code description: Use this code for quotations about an individual's good past experiences with stakeholder engagement as a contextual factor that may affect SH engagement. E.g. past experience with successful decision-maker and researcher partnerships. do NOT use for: - pre-existing relationships, …	Contextual factors Contextual factors: individual
●	cntxt: individual: experience with SH eng._yes_neutral	Category: contextual factors sub-category: individual / personal level code: past experience: neutral code description: Use this code for quotations about an individual's neutral past experience with SH engagement as a contextual factor that may affect SH engagement. E.g. An interviewee mentions that they have interacted with SHs in the past but there is no judgement about what this experience wa…	Contextual factors Contextual factors: individual
●	cntxt: individual: KT training_no	Category: contextual factors sub-category: individual / personal level code: previous KT training_no code description: Use this code for quotations indicating that an individual had no training on IKT/KT before CEBHA+ started.	Contextual factors Contextual factors: individual
●	cntxt: individual: KT training_yes	Category: contextual factors sub-category: individual / personal level code: previous KT training_yes code description: Use this code for quotations about an individual's having participated in some IKT or KT training prior to their involvement in the CEBHA+ project.	Contextual factors Contextual factors: individual
●	cntxt: individual: miscellaneous	Category: contextual factors sub-category: individual / personal level code: miscellaneous code description: Use this code for quotations about contextual factors at the individual or personal level that may affect stakeholder engagement. Use this code for factors not covered under the other "individual" code(s). do NOT use for: - contextual factors at the country, institutional, or project level…	Contextual factors Contextual factors: individual
●	cntxt: individual: reputation	Category: contextual factors sub-category: individual / personal level code: individual reputation code description: Use this code for quotations about an individual's reputation (academic, professionally, personality) as a factor that may affect stakeholder engagement.	Contextual factors Contextual factors: individual
●	cntxt: individual: work experience on the "other" side	Category: contextual factors sub-category: individual / personal level code: work experience on the "other" side code description: Use this code for quotations about individuals who work or who have worked on the "other" side, e.g. policymakers who have previously undertaken research or researchers who have worked in the practice or policymaking sphere.	Contextual factors Contextual factors: individual
●	cntxt: individual_reason_incentives_in kind	Main category: contextual factors Sub-category: individual-level factors Sub-sub-category: reason to engage in researcher-DM partnerships Sub-sub-sub-category: incentives Code: in kind Code description: Use this code for quotations about in kind incentives as a motivation of decision-makers engaging with researchers, e.g. participation in a conference in a nice venue or being able to travel to a …	Contextual factors Contextual factors: individual
●	cntxt: individual_reason_incentives_learning	Main category: contextual factors Sub-category: individual-level factors Sub-sub-category: reason to engage in researcher-DM partnerships Sub-sub-sub-category: incentives Code: learning Code description: Use this code for quotations about a learning opportunity as an incentive to motivate decision-makers to engage with researchers, e.g. decision-makers being able to access training through the CE…	Contextual factors Contextual factors: individual
●	cntxt: individual_reason_incentives_miscellaneous	Main category: contextual factors Sub-category: individual-level factors Sub-sub-category: reason to engage in researcher-DM partnerships Sub-sub-sub-category: incentives Code: miscellaneous Code description: Use this code for quotations about unspecified incentives as a motivation for decision-makers to engage/collaborate with researchers. Often, interviewees may talk about decisionmakers asking…	Contextual factors Contextual factors: individual
●	cntxt: individual_reason_incentives_monetary	Main category: contextual factors Sub-category: individual-level factors Sub-sub-category: reason to engage in researcher-DM partnerships Sub-sub-sub-category: incentives Code: monetary Code description: Use this code for quotations about monetary incentives as a motivation of decision-makers engaging with researchers, e.g. reimbursement for travel cost. If it's clear that the incentive is in kin…	Contextual factors Contextual factors: individual
●	cntxt: individual_reason_mixed/miscellaneous	Main category: contextual factors Sub-category: individual-level factors Sub-sub-category: reason to engage in researcher-DM partnerships Code: mixed/miscellaneous Code description: Use this code for quotations with statements that give multiple motivations for individuals to engage in researcher-decision-maker partnerships. You may also use this code for reasons not yet covered under the other c…	Contextual factors Contextual factors: individual
●	cntxt: individual_reason_personal interest	Main category: contextual factors Sub-category: individual-level factors Sub-sub-category: reason to engage in researcher-DM partnerships Code: personal interest Code description: Use this code for quotations where someone is described as having a personal interest (or even passion) in the project topic/research topic as the reason for why this person is engaging with researchers, i.e. a decision…	Contextual factors Contextual factors: individual
●	cntxt: individual_reason_position	Main category: contextual factors Sub-category: individual-level factors Sub-sub-category: reason to engage in researcher-DM partnerships Code: imperative/position Code description: Use this code for quotations that describe that the motivation for partnerships between researchers and decision-makers is based on partners' position, e.g. someone engages with researchers because it's just "part of …	Contextual factors Contextual factors: individual
●	cntxt: individual_reason_public good	Main category: contextual factors Sub-category: individual-level factors Sub-sub-category: reason to engage in researcher-DM partnerships Code: public good Code description: Use this code for quotations where someone describes that their motivation for engaging in researcher-decision-maker partnerships is working towards the public good, e.g. a researcher might describe that DM involvement increa…	Contextual factors Contextual factors: individual
●	CNTXTL FACTORS	Main category: Use the codes in this category for quotations where interviewees refer to contextual factors related to stakeholder engagement that may be important for SH engagement, including at the macro, institutional, project, and individual level.	Contextual factors
●	CNTXTL FACTORS: ANY/MULTI-LEVEL	Main category: context Sub-category: any/multi-level Use the codes in this sub-category for quotations about contextual factors related to stakeholder engagement that are situated at multiple contextual levels, at unspecified levels or all contextual levels.	Contextual factors Contextual factors: any
●	cntxtl factors: any/multi-level_power	Category: contextual factors sub-category: any, multiple or unspecified levels code: miscellaneous code description: Use this code for instances when a power difference between interview participants and their partners from policy and practice, between interview participants and German IKT team, between others within CEBHA+ is mentioned or where power in general is mentioned or alluded to. The as…	Contextual factors Contextual factors: any
●	CNTXTL FACTORS: INSTITUTION	Main category: context Sub-category: institution Use the codes in this category for quotations about contextual factors related to stakeholder engagement that are situated at the institutional level, that is the researcher's or decision-maker's institution, e.g. universities, university departments, the MoH, DM's employers.	Contextual factors Contextual factors: institution
●	cntxtl factors: institution_absorptive capacity	Category: contextual factors sub-category: institutional / organisational level contextual factors code: absorptive capacity code description: Use this code for quotations about absorptive capacity as a contextual factor at the institutional/organisational level that the interviewee reports and that may affect stakeholder engagement. The instutional / organisation level refers to the level of uni…	Contextual factors Contextual factors: institution
●	cntxtl factors: institution_bureaucracy	Category: contextual factors sub-category: institutional / organisational level contextual factors code: bureaucracy code description: Use this code for quotations about bureaucracy as a contextual factor at the institutional/organisational level that may affect stakeholder engagement. The instutional / organisation level refers to the level of universities, research institutions, government, off…	Contextual factors Contextual factors: institution
●	cntxtl factors: institution_DM priorities/agenda	Category: contextual factors sub-category: macro sub-sub-category: institution code: DM priorities/agenda code description: Use this code for quotations about the decision-maker's or decision-making agenda or priorities that may affect stakeholder engagement. Use this code for aspects related to the decision-maker's job (external agenda & priorities), e.g. the range of topics they work on, concre…	Contextual factors Contextual factors: institution
●	cntxtl factors: institution_EIDM/KT capacity or structures_some	Category: contextual factors sub-category: institutional / organisational level contextual factors code: EIDM/KT capacity/structures: some code description: Use this code for quotations about contextual factors at the institutional/organisational level that may affect stakeholder engagement. The instutional / organisation level refers to the level of universities, research institutions, governmen…	Contextual factors Contextual factors: institution
●	cntxtl factors: institution_EIDM/KT capacity or structures_substantial	Category: contextual factors sub-category: institutional / organisational level contextual factors code: EIDM/KT capacity/structures: substantial code description: Use this code for quotations about contextual factors at the institutional/organisational level that may affect stakeholder engagement. The instutional / organisation level refers to the level of universities, research institutions, go…	Contextual factors Contextual factors: institution
●	cntxtl factors: institution_EIDM/KT capacity_lack of	Category: contextual factors sub-category: institutional / organisational level contextual factors code: lack of EIDM/KT capacity code description: Use this code for quotations about contextual factors at the institutional/organisational level that may affect stakeholder engagement. The instutional / organisation level refers to the level of universities, research institutions, government offices…	Contextual factors Contextual factors: institution
●	cntxtl factors: institution_hierarchies	Category: contextual factors sub-category: institutional / organisational level contextual factors code: institutional hierarchies code description: Use this code for quotations about institutional hierarchies as a contextual factor that may affect stakeholder engagement. The instutional / organisation level refers to the level of universities, research institutions, government, offices, NGOs, et…	Contextual factors Contextual factors: institution
●	cntxtl factors: institution_miscellaneous	Category: contextual factors sub-category: institutional / organisational level contextual factors code: miscellaneous code description: Use this code for quotations about contextual factors at the institutional/organisational level that may affect stakeholder engagement. The instutional / organisation level refers to the level of universities, research institutions, government offices, NGOs, cli…	Contextual factors Contextual factors: institution
●	cntxtl factors: institution_reputation/expertise	Category: contextual factors sub-category: institutional / organisational level code: reputation&expertise code description: Use this code for quotations about an institutions's reputation (academic, professional) and expertise as an important institutional level context factor that may affect stakeholder engagement.	Contextual factors Contextual factors: institution
●	cntxtl factors: institution_resources	Category: contextual factors sub-category: institutional / organisational level contextual factors code: available resources code description: Use this code for quotations about available resources as a relevant contextual factor at the institutional/organisational level that may affect stakeholder engagement. The instutional / organisation level refers to the level of universities, research inst…	Contextual factors Contextual factors: institution
●	cntxtl factors: institution_senior staff support	Category: contextual factors sub-category: institutional / organisational level contextual factors code: senior staff support / leadership code description: Use this code for quotations about contextual factors at the institutional/organisational level that may affect stakeholder engagement. The instutional / organisation level refers to the level of universities, research institutions, governmen…	Contextual factors Contextual factors: institution
●	cntxtl factors: institution_staff continuity	Category: contextual factors sub-category: institutional-level contextual factors code: staff continuity code description: Use this code for quotations about staff turnover and/or staff continuity at the institutional/organisational level that the interviewee reports and that may affect stakeholder engagement. This institution may be the respondent's institution or a partner institution. Occassio…	Contextual factors Contextual factors: institution
●	cntxtl factors: institution_time	Category: contextual factors sub-category: institutional-level contextual factors code: time code description: Use this code for participants' reports about time pressure/limited time or suffcient time or too much workload for SH engagement/IKT at the institutional or organisational level or in their position. This institution may be the respondent's institution or a partner institution. Use this…	Contextual factors Contextual factors: institution
●	CNTXTL FACTORS: MACRO	Main category: context Sub-category: macro Use the codes in this sub-category for quotations about macro-level contextual factors related to stakeholder engagement.	Contextual factors Contextual factors: macro
●	cntxtl factors: macro__economic	Category: contextual factors sub-category: macro level code: economic factors Code description: Use this code for quotations about economic macro-level contextual factors that may affect stakeholder engagement. This could be related to the funding available for implementing health policy or programmes or state funding for government, state agencies etc...	Contextual factors Contextual factors: macro
●	cntxtl factors: macro__geographic	Category: contextual factors sub-category: macro level code: geographic factors code description: Use this code for quotations about geographic macro-level contextual factors that may affect stakeholder engagement, e.g. the size of the country of the spatial distribution of cities, universities, government offices, etc.	Contextual factors Contextual factors: macro
●	cntxtl factors: macro__language	Category: contextual factors sub-category: macro level code: language code description: Use this code for quotations about language as an important macro-level contextual factor that may affect stakeholder engagement. The macro-level includes societal, political, economic and environmental factors. Example: One interview participant may have a particularly good working relationship with certain n…	Contextual factors Contextual factors: macro
●	cntxtl factors: macro__miscellaneous	Category: contextual factors sub-category: macro level code: miscellaneous code description: Use this code for quotations about macro-level contextual factors that may affect stakeholder engagement. The macro-level includes societal, political, economic and environmental factors. Use this macro code for things not covered under the other macro codes. E.g. internet connectivity.	Contextual factors Contextual factors: macro
●	cntxtl factors: macro__political climate	Category: contextual factors sub-category: macro level sub-sub-category: political factors code: political climate code description: Use this code for quotations about political macro-level contextual factors that may affect stakeholder engagement. This specific code refers to a challenging political climate, e.g. political conflict, oppression...	Contextual factors Contextual factors: macro
●	cntxtl factors: macro__political_election reshuffle (senior level)	Category: contextual factors sub-category: macro level sub-sub-category: political factors code: election reshuffle code description: Use this code for quotations about political macro-level contextual factors that may affect stakeholder engagement. Use this specific code for references to (senior) political staff being politically appointed and often changing in the context of elections or on ot…	Contextual factors Contextual factors: macro
●	cntxtl factors: macro__political_factors other than evidence	Category: contextual factors sub-category: macro level sub-sub-category: political factors code: factors other than evidence code description: Use this code for quotations about political macro-level contextual factors that may affect stakeholder engagement. Use this specific code for references to factors other than evidence that influence decision-making.	Contextual factors Contextual factors: macro
●	cntxtl factors: macro__political_levels	Category: contextual factors sub-category: macro level sub-sub-category: political factors code: political levels code description: Use this code for quotations about political macro-level contextual factors that may affect stakeholder engagement. Use this specific code for descriptions of the different political levels in a country and/or the implications for IKT / SH engagement.	Contextual factors Contextual factors: macro
●	cntxtl factors: macro__political_miscellaneous	Category: contextual factors sub-category: macro level sub-sub-category: political factors code: miscellaneous code description: Use this code for quotations about politcal macro-level contextual factors that may affect stakeholder engagement. Use this code for aspect not covered under neighbouring codes. do NOT use for: - contextual factors at the project, institutional or individual levels (see…	Contextual factors Contextual factors: macro
●	cntxtl factors: macro__political_policy-implementation gap	Category: contextual factors sub-category: macro level sub-sub-category: political factors code: policy-implementation gap code description: Use this code for quotations about political macro-level contextual factors that may affect stakeholder engagement. Use this specific code for mentions of a gap between policy that was passed in parliament and on the ground implementation of the policy.	Contextual factors Contextual factors: macro
●	cntxtl factors: macro__research approval_MoH	Category: contextual factors sub-category: macro level Sub-sub-category: research approval code: MoH or DoH code description: Use this code for quotations about regulation of research approval as a macro-level contextual factor that may affect stakeholder engagement. Use this specific code for approval from the Ministry of Health or regional departments, e.g. Western Cape Dept of Health. Examples…	Contextual factors Contextual factors: macro
●	cntxtl factors: macro__research approval_other SHs	Category: contextual factors sub-category: macro level Sub-sub-category: research approval code: other SHs code description: Use this code for quotations about regulation of research approval as a macro-level contextual factor that may affect stakeholder engagement. Use this specific code for approval from other ministries (i.e. non-MoH) and non-ministry stakeholders, e.g. police allowing project…	Contextual factors Contextual factors: macro
●	cntxtl factors: macro__research funding_for KT	Category: contextual factors sub-category: macro level sub-sub-category: research funding code: KT code description: Use this code for quotations about research funding as a macro-level contextual factor that may affect stakeholder engagement. The macro-level includes societal, political, economic and environmental factors. This code applies for any reference indicating funders supporting KT and …	Contextual factors Contextual factors: macro
●	cntxtl factors: macro__research funding_foreign funder	Category: contextual factors sub-category: macro level sub-sub-category: research funding code: foreign funder code description: Use this code for quotations about research funding as a macro-level contextual factor that may affect stakeholder engagement. The macro-level includes societal, political, economic and environmental factors. Use this code for any references of a foreign funding source …	Contextual factors Contextual factors: macro
●	cntxtl factors: macro__research funding_funder priorities	Category: contextual factors sub-sub-category: research funding code: funder priorities and requirements code description: Use this code for quotations about research funding as a macro-level contextual factor that may affect stakeholder engagement. The macro-level includes societal, political, economic and environmental factors. This code applies for any references indicating the funder's priori…	Contextual factors Contextual factors: macro
●	cntxtl factors: macro__research funding_local funding	Category: contextual factors sub-category: macro level sub-sub-category: research funding code: local funding code description: Use this code for quotations about research funding as a macro-level contextual factor that may affect stakeholder engagement. The macro-level includes societal, political, economic and environmental factors.this code applies for quotations related to local funding for r…	Contextual factors Contextual factors: macro
●	cntxtl factors: macro__research_competition/siloed work	Category: contextual factors sub-category: macro level code: research competition / siloed work code description: Use this code for quotations about researchers' competition and often siloed work as an important macro level factor affecting stakeholder engagement. This may be in relation to researchers competing for decision-makers' time or attention or competition as part of the research realiti…	Contextual factors Contextual factors: macro
●	cntxtl factors: macro__research_miscellaneous	Category: contextual factors sub-category: macro level code: research-miscellaneous code description: Use this code for quotations about aspects of conducting or planning research in the local context that are not covered under neighbouring codes.	Contextual factors Contextual factors: macro
●	cntxtl factors: macro__societal_concern about NCDs	Category: contextual factors sub-category: macro level sub-sub-category: societal factors code: societal concern about NCDs code description: Use this code for quotations about societal-level contextual factors that may affect stakeholder engagement. Use this specific code for mentions of a concern of the population about RTIs or diabetes etc. This may include reference to carfree days or Annual …	Contextual factors Contextual factors: macro
●	cntxtl factors: macro__societal_F2F culture	Category: contextual factors sub-category: macro level sub-sub-category: societal factors code: F2F culture code description: Use this code for quotations about societal-level contextual factors that may affect stakeholder engagement. Use this specific code for mentions of face to face culture, i.e. people responding more to face to face interactions, not much to emails...	Contextual factors Contextual factors: macro
●	cntxtl factors: macro__societal_fear of losing face	Category: contextual factors sub-category: macro level sub-sub-category: societal factors code: fear of losing face code description: Use this code for quotations about societal-level contextual factors that may affect stakeholder engagement. Use this specific code for mentions of a fear of losing face as an aspect shaping RS-DM interaction.	Contextual factors Contextual factors: macro
●	cntxtl factors: macro__societal_miscellaneous	Category: contextual factors sub-category: macro level sub-sub-category: societal factors code: miscellaneous code description: Use this code for quotations about societal-level contextual factors that may affect stakeholder engagement. Use this specific code for aspects not covered under neighbouring codes. do NOT use for: - contextual factors at the project, institutional or individual levels (…	Contextual factors Contextual factors: macro
●	cntxtl factors: macro__societal_police	Category: contextual factors sub-category: macro level sub-sub-category: societal factors code: police code description: Use this code for quotations about societal-level contextual factors that may affect stakeholder engagement. Use this specific code for societal views of the police.	Contextual factors Contextual factors: macro
●	cntxtl factors: macro_KT landscape_DM interest	Category: contextual factors sub-category: macro level sub-sub-category: KT landscape code: DM interest in EIDM, evidence & exchange with researchers code description: Use this code for quotations about the existing knowledge translation landscape as a macro-level contextual factor that may affect stakeholder engagement. This code is used for quotations that describe an ongoing interest of govern…	Contextual factors Contextual factors: macro
●	cntxtl factors: macro_KT landscape_engagement as lip service	Category: contextual factors sub-category: macro level sub-sub-category: KT landscape code: collaboration not implemented, lip service code description: Use this code for quotations about lack of a meaningful EIDM culture, e.g. organisations might be paying lip service to EIDM whilst not using evidence at all or research and decision-making may be very disconnected despite statements that claim o…	Contextual factors Contextual factors: macro
●	cntxtl factors: macro_KT landscape_institutionalised processes	Category: contextual factors sub-category: macro level sub-sub-category: KT landscape code: institutionalised processes Code description: Use this code for quotations about the existing knowledge translation landscape as a macro-level contextual factor that may affect stakeholder engagement: institutionalised processes are established processes by government or other authorities to consult eviden…	Contextual factors Contextual factors: macro
●	cntxtl factors: macro_KT landscape_KT culture/tradition	Category: contextual factors sub-category: macro level sub-sub-category: KT landscape code: KT culture code description: Use this code for quotations about the existing knowledge translation landscape as a macro-level contextual factor that may affect stakeholder engagement: KT culture describes that the participant is part of an environment where KT or EIDM is practiced routinely, often since lo…	Contextual factors Contextual factors: macro
●	cntxtl factors: macro_KT landscape_KTP	Category: contextual factors sub-category: macro level sub-sub-category: KT landscape code: KTP code description: Use this code for quotations about the existing knowledge translation landscape as a macro-level contextual factor that may affect stakeholder engagement: This code is used for KTPs as one specific KT/EIDM structure. This code is used for EIDM structures that are independent of the CE…	Contextual factors Contextual factors: macro
●	cntxtl factors: macro_KT landscape_misalignment	Category: contextual factors sub-category: macro level sub-sub-category: KT landscape code: misalignment of research and decision-making code description: Use this code for quotations about lack of a meaningful EIDM culture, i.e. research and decision-making priorities being misaligned. If this is true for the alignment in CEBHA+, too, you may want to add an intervention outcomes or implementatio…	Contextual factors Contextual factors: macro
●	cntxtl factors: macro_KT landscape_miscellaneous	Category: contextual factors sub-category: macro level sub-sub-category: KT landscape code: EIDM structures/culture code description: Use this code for quotations about the existing knowledge translation landscape as a macro-level contextual factor that may affect stakeholder engagement. Use this code for aspects not covered under neighbouring codes. This code is used for EIDM structures that are…	Contextual factors Contextual factors: macro
●	cntxtl factors: macro_KT landscape_networks/organisations	Category: contextual factors sub-category: macro level sub-sub-category: KT landscape code: networks/organisations code description: Use this code for quotations about the existing knowledge translation landscape as a macro-level contextual factor that may affect stakeholder engagement: This code is for descriptions of other networks dedicated to KT / EIDM in the respective context. This code is …	Contextual factors Contextual factors: macro
●	cntxtl factors: macro_KT landscape_non-existent/no	Category: contextual factors sub-category: macro level sub-sub-category: KT landscape code: EIDM structures/culture: NO code description: Use this code for quotations about the existing knowledge translation landscape as a macro-level contextual factor that may affect stakeholder engagement. This code is used for quotations that describe that there is no culture of KT or EIDM or little interest o…	Contextual factors Contextual factors: macro
●	cntxtl factors: macro_KT landscape_regular DM-RS exchange	Category: contextual factors sub-category: macro level sub-sub-category: KT landscape code: regular DM - RS exchange code description: Use this code for quotations about the existing knowledge translation landscape as a macro-level contextual factor that may affect stakeholder engagement: This code is for regular meetings between decision-makers and researchers, or routine collaboration between r…	Contextual factors Contextual factors: macro
●	cntxtl factors: macro_KT landscape_small community	Category: contextual factors sub-category: macro level sub-sub-category: KT landscape code: small community code description: Use this code for quotations about the EIDM-relevant community being quite small in the country, e.g. researchers may know policymakers from university or public health practitioners and researchers might repetitive encounters collaborating on many different projects over …	Contextual factors Contextual factors: macro
●	CNTXTL FACTORS: PRE-EXISTING RELATIONSHIPS	Main category: context Sub-category: pre-existing relationships Use the codes in this sub-category for quotations about contextual factors related to pre-existing relationships in stakeholder engagement.	Contextual factors Contextual factors: pre-existing relationships
●	cntxtl factors: pre-existing_individual	Category: contextual factors sub-category: pre-existing relationships code: pre-existing relationships: an individual researcher's previous relationships code description: Use this code for participants reporting about pre-existing relationships as a contextual factor affecting stakeholder engagement, that is relationships pre-dating CEBHA+. Use this code for quotations about an individual resear…	Contextual factors Contextual factors: pre-existing relationships
●	cntxtl factors: pre-existing_institutional connection	Category: contextual factors sub-category: pre-existing relationships code: pre-existing relationships: institutional connection Code description: Use this code for quotations about cross-links or connections between CEBHA+ institutions and partner institutions that give rise to pre-existing relationships as a contextual factor that may affect stakeholder engagement. It may be present in the inst…	Contextual factors Contextual factors: pre-existing relationships
●	cntxtl factors: pre-existing_similar projects	Category: contextual factors sub-category: pre-existing relationships code: pre-existing relationships: similar projects code description: Use this code for participants reporting about pre-existing relationships between research teams and decision-makers, that originate from having worked on similar projects in the past, as a contextual factor affecting stakeholder engagement. This is about rela…	Contextual factors Contextual factors: pre-existing relationships
●	CNTXTL FACTORS: PROJECT	Main category: context Sub-category: project-level Use the codes in this sub-category for quotations about project-level contextual factors related to stakeholder engagement. The project-level is the CEBHA+ project/network.	Contextual factors Contextual factors: project
●	cntxtl factors: project_communication_bad	Category: contextual factors sub-category: project level sub-sub-category: communication code: bad code description: Use this code for quotations about project-related contextual factors that may affect stakeholder engagement. The project level is understood as the CEBHA+ project and network or specific research tasks within the collaboration. Use this code for references to bad communication or …	Contextual factors Contextual factors: project
●	cntxtl factors: project_communication_good	Category: contextual factors sub-category: project level sub-sub-category: communication code: good code description: Use this code for quotations about project-related contextual factors that may affect stakeholder engagement. The project level is understood as the CEBHA+ project and network or specific research tasks within the collaboration. Use this code for reference to good communication in…	Contextual factors Contextual factors: project
●	cntxtl factors: project_complex evidence_no	Category: contextual factors sub-category: project level code: complex evidence_no code description: Use this code for quotations about the evidence from CEBHA+ or the research topic NOT being perceived as very complex - a project-related contextual factor that may affect stakeholder engagement.	Contextual factors Contextual factors: project
●	cntxtl factors: project_complex evidence_yes	Category: contextual factors sub-category: project level code: complex evidence_yes code description: Use this code for quotations about the evidence from CEBHA+ or the research topic being perceived as complex - a project-related contextual factor that may affect stakeholder engagement. This might include references to DMs struggling to understand research from CEBHA+ or its research aims.	Contextual factors Contextual factors: project
●	cntxtl factors: project_complex project_no	Category: contextual factors sub-category: project level code: complex project_no Code description: Use this code for quotations saying that the project is not being perceived as complex - a project-related contextual factor that may affect stakeholder engagement.	Contextual factors Contextual factors: project
●	cntxtl factors: project_complex project_yes	Category: contextual factors sub-category: project level code: complex project_yes code description: Use this code for quotations about the project being perceived as complex as a project-related contextual factor that affect stakeholder engagement. This might include references to CEBHA+ having a lot of puzzle pieces or parts to it (complexity implied).	Contextual factors Contextual factors: project
●	cntxtl factors: project_conflicts	Category: contextual factors sub-category: project level code: deliverables code description: Use this code for quotations about conflicts within the CEBHA+ team that may affect SH engagement and/or implementation of the IKT approach. For conflicts that arise due to the SH engagement / iKT approach use the respective unintended consequences code.	Contextual factors Contextual factors: project
●	cntxtl factors: project_deliverables	Category: contextual factors sub-category: project level code: deliverables code description: Use this code for quotations about deliverables as project-related contextual factors that affect stakeholder engagement. This might include references to IKT outputs being deliverables that needed to be accomplished in the project. Interviewees may say that some IKT activity "needed to be done" which ma…	Contextual factors Contextual factors: project
●	cntxtl factors: project_miscellaneous	Category: contextual factors sub-category: project level code: miscellaneous code description: Use this code for quotations about project-related contextual factors that may affect stakeholder engagement. The project level is understood as the CEBHA+ project and network or specific research tasks within the collaboration. Use this code for aspects not covered by neighbouring codes. 19.08.2021 14:…	Contextual factors Contextual factors: project
●	cntxtl factors: project_old CEBHA network	Category: contextual factors sub-category: project level code: old CEBHA network code description: Use this code for quotations about project-related contextual factors that may affect stakeholder engagement. The project level is understood as the CEBHA+ project and network or specific research tasks within the collaboration. Use this code for reference to the old CEBHA network (the CEBHA+ precur…	Contextual factors Contextual factors: project
●	cntxtl factors: project_research tasks	Category: contextual factors sub-category: project level code: research tasks code description: Use this code for quotations about contextual factors related to the number or content of research tasks in CEBHA+. DO use this code for any mention of research task activities that have a link with stakeholder engagement or IKT, for example an RT team's deliberations about the relevant stakeholders fo…	Contextual factors Contextual factors: project
●	cntxtl factors: project_South-North aspects	Category: contextual factors sub-category: project level code: South-North aspects code description: Use this code for quotations about project-related contextual factors that may affect stakeholder engagement. The project level is understood as the CEBHA+ project and network or specific research tasks within the collaboration. Use this code for aspects - particularly challenges - arising from th…	Contextual factors Contextual factors: project
●	cntxtl factors: project_timeline	Category: contextual factors sub-category: project level code: project timeline code description: Use this code for quotations about contextual factors related to the overall project timeline in CEBHA+ that may play a role in shaping stakeholder engagement. The project level is understood as the CEBHA+ project/network and specific research tasks within the collaboration. Use this code for aspects…	Contextual factors Contextual factors: project
●	COVID_IMPACT	Main category: Use the codes in this category for quotations describing the impact of the COVID-19 pandemic on activities in CEBHA+. This could include impact on research, stakeholder engagement/IKT, the CEBHA+ project timeline, the impact on the country of the interviewee. This may include a decrease of activities but also increased research and stakeholder engagement on COVID-19 related topics.	COVID-19-related impact
●	covid_impact_activity: other/miscellaneous	Category: Impact of the COVID-19 pandemic Sub-category: activities affected Code: other/miscellaneous Code description: Use this code for quotations where participants describe the impact of the COVID-19 pandemic on activities other than research and IKT/stakeholder engagement, e.g. clinical work. In addition to applying this code use a label from the "quantity" sub-category to indicate whether t…	COVID-19-related impact
●	covid_impact_activity: research	Category: Impact of the COVID-19 pandemic Sub-category: activities affected Code: research Code description: Use this code for quotations where participants describe the impact of the COVID-19 pandemic on their research activities (e.g. systematic reviews conducted, primary research). In addition to applying this code use a label from the "quantity" sub-category to indicate whether this activity …	COVID-19-related impact
●	covid_impact_activity: SH engagement_adhoc	Category: Impact of the COVID-19 pandemic Sub-category: activities affected Code: adhoc SH engagement Code description: Use this code for quotations where participants describe the impact of the COVID-19 pandemic on adhoc SH activities, that is stakeholder engagement that comes up as an opportunity, not pre-planned engagement as detailed in the iKT strategy. In addition to applying this code use …	COVID-19-related impact
●	covid_impact_activity: SH engagement_IKT/planned	Category: Impact of the COVID-19 pandemic Sub-category: activities affected Code: IKT/SH engagement Code description: Use this code for quotations where participants describe the impact of the COVID-19 pandemic on IKT activities (e.g. workshops with stakeholders, writing policy briefs). In addition to applying this code use a label from the "quantity" sub-category to indicate whether this activit…	COVID-19-related impact
●	covid_impact_quant: less activity	Category: Impact of the COVID-19 pandemic Sub-category: quantity of activities Code: less activitiy Code description: Use this code for quotations where participants that a certain activity was undertaken less often in the COVID-19 pandemic, e.g. fewer meetings with decision-makers bc face-to-face meetings were not possible, less research activity because fieldwork was not possible... In addition…	COVID-19-related impact
●	covid_impact_quant: more/new activity	Category: Impact of the COVID-19 pandemic Sub-category: quantity of activities Code: more activitiy Code description: Use this code for quotations where participants state that a certain activity was undertaken more often during the COVID-19 pandemic or that a new activity was taken up - e.g. more collaboration with stakeholders due to COVID-related consultations, new activity to work on evidence…	COVID-19-related impact
●	covid_impact_quant: no change	Category: Impact of the COVID-19 pandemic Sub-category: quantity of activities Code: no change Code description: Use this code for quotations where participants describe that the COVID-19 pandemic had no impact on the quantity of their activties (e.g. no impact on stakeholder engagement as there was a natural pause in the engagement anyways; no change of the quantity of research activities becaus…	COVID-19-related impact
○	IKT STRATEGY		IKT strategy
○	IKT STRATEGY COMPONENTS	Category: site-specific IKT Strategy Sub-category: components of the IKT strategy Use these codes for quotations describing the categories in the stakeholder engagement matrix (= the components making up the IKT strategy)	IKT strategy components IKT strategy
○	IKT strategy_comp__aim(s)	Category: site-specific IKT Strategy Sub-category: components of the IKT strategy code: aim(s) of the systematic IKT strategy Code description: Use this code for quotations that describe the aim or central aims of the systematic IKT strategy, e.g. when participants refer to wanting to raise decision-makers' awareness of the project, when they want to build partners' capacity, or when they talk ab…	IKT strategy components IKT strategy
○	IKT strategy_comp__forum/vehicle_dissemination workshop	Category: site-specific IKT Strategy Sub-category: components of the IKT strategy Sub-sub-category: forum/vehicle code: dissemination workshop Code description: Use this code for quotations that describe the components of the stakeholder engagement strategy: The forum or vehicle used or envisioned to engage stakeholders according to the IKT strategy. Use this code for any reference to disseminati…	IKT strategy components IKT strategy
○	IKT strategy_comp__forum/vehicle_KTP	Category: site-specific IKT Strategy Sub-category: components of the IKT strategy Sub-sub-category: forum/vehicle code: KTP Code description: Use this code for quotations that describe the components of the stakeholder engagement strategy: The forum or vehicle used or envisioned to engage stakeholders according to the IKT strategy. Use this code for references to a Knowledge Translation Platform …	IKT strategy components IKT strategy
○	IKT strategy_comp__forum/vehicle_miscellaneous	Category: site-specific IKT Strategy Sub-category: components of the IKT strategy code: forum/vehicle Code description: Use this code for quotations that describe the components of the stakeholder engagement strategy: The forum or vehicle used or envisioned to engage stakeholders according to the IKT strategy, e.g. through a face-to-face meeting, a workshop, email, phone call, whatapp , twitter o…	IKT strategy components IKT strategy
○	IKT strategy_comp__forum/vehicle_policy dialogue	Category: site-specific IKT Strategy Sub-category: components of the IKT strategy Sub-sub-category: forum/vehicle code: policy dialogue Code description: Use this code for quotations that describe the components of the stakeholder engagement strategy: The forum or vehicle used or envisioned to engage stakeholders according to the IKT strategy. Use this code for references to policy dialogue(s). Y…	IKT strategy components IKT strategy
○	IKT strategy_comp__medium_issue brief	Category: site-specific IKT Strategy Sub-category: components of the IKT strategy Sub-sub-category: medium code: issue brief Code description: Use this code for quotations that describe the components of the stakeholder engagement strategy: the medium used or envisioned to engage stakeholders according to the IKT strategy. Use this code for issue briefs Examples: an interview participant might de…	IKT strategy components IKT strategy
○	IKT strategy_comp__medium_miscellaneous	Category: site-specific IKT Strategy Sub-category: components of the IKT strategy Sub-sub-category: medium code: miscellaneous Code description: Use this code for quotations that describe the components of the stakeholder engagement strategy: the medium used or envisioned to engage stakeholders according to the IKT strategy. Use this code for media not covered under the neighbouring codes. Exampl…	IKT strategy components IKT strategy
○	IKT strategy_comp__medium_policy brief	Category: site-specific IKT Strategy Sub-category: components of the IKT strategy Sub-sub-category: medium code: policy brief Code description: Use this code for quotations that describe the components of the stakeholder engagement strategy: the medium used or envisioned to engage stakeholders according to the IKT strategy. Use this code for policy briefs. Examples: an interview participant might…	IKT strategy components IKT strategy
○	IKT strategy_comp__message	Category: site-specific IKT Strategy Sub-category: components of the IKT strategy code: message Code description: Use this code for quotations that describe the components of the stakeholder engagement strategy: the message that is planned to convey/conveyed to a certain stakeholder according to the IKT strategy, for example CEBHA+ research goals, research task activities, certain research result…	IKT strategy components IKT strategy
○	IKT strategy_comp__messenger	Category: site-specific IKT strategy Sub-category: components of the IKT strategy code: messenger Code description: Use this code for quotations that describe the components of the stakeholder engagement strategy: the designated IKT messengers, i.e. the person among the IKT team who would interact directly with a decision-maker ("the messenger") as specified in the IKT strategy. You may add a "fi…	IKT strategy components IKT strategy
○	IKT strategy_comp__timing	Category: site-specific IKT Strategy Sub-category: components of the IKT strategy code: timing Code description: Use this code for quotations that describe the components of the stakeholder engagement strategy: the best timing for IKT, i.e. deliberations about timing that is or is not suitable for approaching a given decision-maker. Consideration of the "window of opportunity". You may add a "fid…	IKT strategy components IKT strategy
○	IKT STRATEGY_COMP_MAIN STAKEHOLDERS		IKT strategy components_main stakeholders
○	IKT strategy_comp_main stakeholders__general	Category: site-specific IKT Strategy Sub-category: components of the IKT strategy Sub-sub-category: main stakeholders code: general comments and reflections Code description: Use this code for quotations where interview participants make general comments and reflections about stakeholders without naming a stakeholder explicitly or when the 'category' of stakeholder is not relevant. The participan…	IKT strategy components_main stakeholders
○	IKT strategy_comp_main stakeholders_academic	Category: site-specific IKT Strategy Sub-category: components of the IKT strategy Sub-sub-category: main stakeholders code: academic stakeholders Code description: Use this code for quotations where stakeholders mentioned - who are based at a university, have a research focus, or are otherise affiliated to an academic setting - refers to institutions or individuals working within this entity e.g.…	IKT strategy components_main stakeholders
○	IKT strategy_comp_main stakeholders_communities	Category: site-specific IKT Strategy Sub-category: components of the IKT strategy Sub-sub-category: main stakeholders code: communities Code description: Use this code for quotations where: - the community is listed as a stakeholder for CEBHA+ - do NOT use for NGOs, which have their own code The participants may raise these aspects without explicit reference to IKT or the IKT strategy.	IKT strategy components_main stakeholders
○	IKT strategy_comp_main stakeholders_DoH	Category: site-specific IKT Strategy Sub-category: components of the IKT strategy Sub-sub-category: main stakeholders code: Department of Health (DoH) Code description: Use this code for quotations where: - reference to CEBHA+ stakeholders in health departments below the national level, e.g. provincial departments of health in South Africa - DoHs are the equivalents of ministries, that is they ha…	IKT strategy components_main stakeholders
○	IKT strategy_comp_main stakeholders_healthcare	Category: site-specific IKT Strategy Sub-category: components of the IKT strategy Sub-sub-category: main stakeholders code: healthcare institutions Code description: Use this code for quotations where: - healthcare institutions (or individuals working within these entities) e.g. hospitals, primary care centers, are refered to as a stakeholder in CEBHA+ The participants may raise these aspects wit…	IKT strategy components_main stakeholders
○	IKT strategy_comp_main stakeholders_local authority	Category: site-specific IKT Strategy Sub-category: components of the IKT strategy Sub-sub-category: main stakeholders code: local authority Code description: Use this code for quotations where: - a local health or other authority is named as a CEBHA+ stakeholder (publicly funded organ) - (or individuals working within this entity) - e.g. Kampala Capital City Authority, RBC as the MoH implementati…	IKT strategy components_main stakeholders
○	IKT strategy_comp_main stakeholders_Ministry_other	Category: site-specific IKT Strategy Sub-category: components of the IKT strategy Sub-sub-category: main stakeholders code: other Ministry Code description: Use this code for quotations where: - a Ministry or Ministries other than the Ministry of Health are mentioned as stakeholders in CEBHA+ - (or individuals working within this entity) The participants may raise these aspects without explicit r…	IKT strategy components_main stakeholders
○	IKT strategy_comp_main stakeholders_MoH	Category: site-specific IKT Strategy Sub-category: components of the IKT strategy Sub-sub-category: main stakeholders code: Ministry of Health (MoH) Code description: Use this code for quotations where: - the national Ministry of Health (or individuals working within this entity) is referred to as a stakeholder in CEBHA+ The participants may raise these aspects without explicit reference to IKT o…	IKT strategy components_main stakeholders
○	IKT strategy_comp_main stakeholders_NGO	Category: site-specific IKT Strategy Sub-category: components of the IKT strategy Sub-sub-category: main stakeholders code: Non-governmental organisation (NGO) Code description: Use this code for quotations where: - an NGO or NGOs are referred to as a stakeholder in CEBHA+ - this includes individuals working for NGOs - NGOs understood as not-for-profit, often charitable organisations that are not…	IKT strategy components_main stakeholders
○	IKT strategy_comp_main stakeholders_other	Category: site-specific IKT Strategy Sub-category: components of the IKT strategy Sub-sub-category: main stakeholders code: other Code description: Use this code for quotations where: - Other institutions or individuals not covered under the other stakeholder codes are referred to as a stakeholder in CEBHA+ - e.g. parliamentary committee, national essential medicine's committee, media, private ac…	IKT strategy components_main stakeholders
○	IKT strategy_comp_main stakeholders_police	Category: site-specific IKT Strategy Sub-category: components of the IKT strategy Sub-sub-category: main stakeholders code: police Code description: Use this code for quotations where: - the police is referred to as a stakeholder in CEBHA+ - this includes individuals working for the police The participants may raise these aspects without explicit reference to IKT or the IKT strategy.	IKT strategy components_main stakeholders
○	IKT strategy_comp_main stakeholders_supranational	Category: site-specific IKT Strategy Sub-category: components of the IKT strategy Sub-sub-category: main stakeholders code: supranational Code description: Use this code for quotations where: - supranational organisations are referred to as a stakeholder in CEBHA+, e.g. WHO - this includes individuals working for those organisations The participants may raise these aspects without explicit refere…	IKT strategy components_main stakeholders
○	IKT STRATEGY_SH ANALYSIS	Category: site-specific IKT strategy Sub-category: SH analysis results Use these codes for quotations that describe results of the stakeholder analysis, that is where a stakeholder is positioned on the power-interest-grid. This sub-category thus describes aspects of the intervention (=site-specific IKT strategy) The codes in this category don't have to be used for every stakeholder. However, if i…	IKT strategy (stakeholder analysis) IKT strategy
○	IKT strategy_SH analysis: avoider	Category: site-specific IKT Strategy Sub-category: SH analysis Code: avoider Code description: Use this code for quotations that describe the power and interest of a stakeholder: someone who has low power and low interest in the topic is an avoider. This label can be assigned by an interview partcipant (or stated in the stakeholder engagement analysis) or assigned by the researcher undertaking th…	IKT strategy (stakeholder analysis) IKT strategy
○	IKT strategy_SH analysis: blocker	Category: site-specific IKT Strategy Sub-category: SH analysis Code: blocker Code description: Use this code for quotations that describe the power and interest of a stakeholder: someone who has high power and low interest in the topic is a blocker; This label can be assigned by an interview partcipant (or stated in the stakeholder analysis) or assigned by the researcher undertaking the coding. Y…	IKT strategy (stakeholder analysis) IKT strategy
○	IKT strategy_SH analysis: champion	Category: site-specific IKT Strategy Sub-category: SH analysis Code: champion Code description: Use this code for quotations that describe the power and interest of a stakeholder: someone who has high power and high interest in the topic is a champion. A stakeholder who is very supportive of the research collaboration and is instrumental in supporting CEBHA+ goals. This label can be assigned by a…	IKT strategy (stakeholder analysis) IKT strategy
○	IKT strategy_SH analysis: silent booster	Category: site-specific IKT Strategy Sub-category: SH analysis Code: silent booster Code description: Use this code for quotations that describe the power and interest of a stakeholder: someone who has low power but high interest in the topic is a silent booster; This is a stakeholder who is very supportive of the research collaboration but may not have a lot of means to support the project (powe…	IKT strategy (stakeholder analysis) IKT strategy
●	IMPL AGENTS		Implementation Implementation agents
●	Impl agents_IKT team	Category: implementation Code: implementation agents: cross-country IKT team Code description: Use this code for quotations about the IKT team, that is the group of IKT focal points from all sites and LMU and SU IKT stafff.	Implementation Implementation agents
●	Impl agents_implementing IKT team/staff	Category: implementation Code: implementation agents: implementing IKT team/staff Code description: Use this code for quotations about the personnel involved in implementing the IKT approach at the five African sites, e.g. quotes about the role of the IKT focal points or the skills needed to undertake this work, or IKT team composition. This code is about reflections about the skills of the IKT p…	Implementation Implementation agents
●	Impl agents_MUC IKT team	Category: implementation Code: implementation agents: MUC IKT team Code description: Use this code for quotations about the IKT team based at LMU Munich.	Implementation Implementation agents
●	Impl agents_SU team	Category: implementation Code: implementation agents: MUC IKT team Code description: Use this code for quotations about the IKT team based at Stellenbosch University (SU).	Implementation Implementation agents
●	IMPL PROCESS	Implementation process of the IKT approach and local IKT strategies	Implementation process Implementation
●	Impl process_0_engagement bf IKT/project launch	Category: Implementation process code: engagement before IKT launch Code description: Use this code for quotations about CEBHA+ researchers approaching decision-makers early in the research process and before IKT was formally launched. This may be part of their usual routine of conducting research. For quotations about the recommendation to engage early - use the respective recommendation code. 2…	Implementation process Implementation
●	Impl process_00_grant writing/prioritisation	Category: Implementation process code: CEBHA+ grant writing / priority setting exercise Code description: Use this code for quotations referring to the grant writing process for CEBHA+, including descriptions of the priority setting exercise and how and which stakeholders were involved.	Implementation process Implementation
●	Impl process_1_planning&prep__IKT approach	Category: Implementation process code: planning & preparation: development of the IKT approach for CEBHA+, exploration Code description: Use this code for any quotations describing how the very first step of the implementation process of IKT in CEBHA+ was conducted. Pfadenhauer et al describe this step of exploration as follows: "The first stage is characterised by the exploration of organisation…	Implementation process Implementation
●	Impl process_1_planning&prep_evaluation	Category: Implementation process code: planning & preparation: evaluation Code description: Use this code for quotations referring to planning of the IKT evaluation activities.	Implementation process Implementation
●	Impl process_1_planning&prep_IKT workshop Cape Town_no	Category: Implementation process code: planning and preparation: IKT workshop attendance: no Code description: Use this code for any quotations indicating that someone did not participate in the IKT workshop in Cape Town in 2018.	Implementation process Implementation
●	Impl process_1_planning&prep_IKT workshop Cape Town_yes	Category: Implementation process code: planning and preparation: IKT workshop attendance: yes Code description: Use this code for any quotations indicating that someone did participate in the IKT workshop in Cape Town in 2018.	Implementation process Implementation
●	Impl process_1_planning&prep_post workshop training of colleagues_no	Category: Implementation process code: planning and preparation: IKT training of colleagues: no Code description: Use this code for any quotations indicating that CEBHA+ researchers who attended the IKT workshop in Cape Town in 2018 did not convey the workshop content to colleagues at their sites who had not attended the workshop.	Implementation process Implementation
●	Impl process_1_planning&prep_post workshop training of colleagues_yes	Category: Implementation process code: planning and preparation: IKT training of colleagues: yes Code description: Use this code for any quotations indicating that CEBHA+ researchers who attended the IKT workshop in Cape Town in 2018 conveyed the workshop content to colleagues at their sites who had not attended the workshop.	Implementation process Implementation
●	Impl process_2_SH mapping&analysis: no	Category: Implementation process code: SH mapping and analysis: no Code description: Use this code for quotations describing that no mapping and analysis of stakeholders took place. NB codes in this category can also signal (non-)adoption of the systematic IKT approach.	Implementation process Implementation
●	Impl process_2_SH mapping&analysis: yes	Category: Implementation process code: SH mapping and analysis: yes Code description: Use this code for quotations describing how the stakeholder mapping and analysis was conducted, that is the identification of relevant stakeholders, meetings to find out about possible partners or to gauge DM interest to be engaged, or analysis of DM interest and power as part of the implemenation process of IKT…	Implementation process Implementation
●	Impl process_3_IKT strategy development: no	Category: Implementation process code: IKT strategy development: no Code description: Use this code for quotations describing that no development of an IKT strategy took place. NB codes in this category can also signal (non-)adoption of the systematic IKT approach.	Implementation process Implementation
●	Impl process_3_IKT strategy development: yes	Category: Implementation process code: IKT strategy development: yes Code description: Use this code for quotations describing how the development of the IKT strategy as part of the implementation process of IKT in CEBHA+ took place. The development of the IKT strategy built upon the SH analysis and mapping, which has its own code. Any reference to the planned engagements as a result of the SH an…	Implementation process Implementation
●	Impl process_4_IKT strategy monitoring_no	Category: Implementation process code: monitoring: no Code description: Use this code for quotations describing that there were no or insufficient or only some monitoring activities undertaken as part of the systematic IKT strategy, e.g. participants indicating that they only noted on some occasions how many decision-makers attended an informal meeting. Do not use this code for quotations that on…	Implementation process Implementation
●	Impl process_4_IKT strategy monitoring_yes	Category: Implementation process code: monitoring: yes Code description: Use this code for quotations describing the monitoring activities undertaken as part of the systematic IKT strategy, e.g. participants indicating that they noted how many decision-makers attended an informal meeting and taking minutes; or documenting the stakeholder engagement. Only use this code for activities that took pla…	Implementation process Implementation
●	Impl process_5_IKT strategy update&maintenance_no	Category: Implementation process code: update and maintenance: no Code description: Use this code for quotations describing that the continuous updating and maintenance of the IKT strategies did not take place. NB codes in this category can also signal (non-)adoption of the systematic IKT approach.	Implementation process Implementation
●	Impl process_5_IKT strategy update&maintenance_yes	Category: Implementation process code: update & maintenance: yes Code description: Use this code for quotations describing the continuous updating and maintenance of the IKT strategies. This might include information about the steps that are part of this work, e.g. regular meetings within the local IKT team at one site, deliberations about new stakeholders to include in the engagement strategy, o…	Implementation process Implementation
●	Impl process_6a_IKT team calls	Category: Implementation process code: 6a IKT team calls Code description: Use this code for quotations about IKT team calls and updates.	Implementation process Implementation
●	Impl process_6b_IKT team training	Category: Implementation process code: 6b IKT team training Code description: Use this code for quotations about IKT team training as the project progressed (IKT issue briefs course, trainings provided by SU).	Implementation process Implementation
●	Impl process_6c_IKT team activities	Category: Implementation process code: 6c IKT team activities Code description: Use this code for quotations about IKT team activities, e.g. joint projects such as the Frontiers articles.	Implementation process Implementation
●	Impl process_6d_networking mtg	Category: Implementation process code: 6d networking meeting Code description: Use this code for quotations about IKT content at / or IKT aspects related to the networking meeting.	Implementation process
●	Impl process_7a_informational meetings	Category: Implementation process Code: informational meetings Code description: Use this code for quotations referring to meetings to establish relationships between researchers and decision-makers as well as meetings to inform stakeholders about CEBHA+ and e.g. aims of the research. Follow-up meetings (after the project has been already introduced) fall under the "update meetings" code. When it'…	Implementation process Implementation
●	Impl process_7b_update meetings	Category: Imlementation process Code: update meetings Code description: Use this code for quotations referring to meetings or interactions (could be online meetings or phone calls, too) to maintain relationships between researchers and decision-makers, i.e. follow-up meetings or calls after the project has first been introduced to the stakeholders. The initial meeting to inform stakeholders about…	Implementation process Implementation
●	Impl process_8_dissemination activities	Category: Implementation process code: 7 dissemination activities Code description: Use this code for quotations about dissemination activities as the project progressed (IKT issue briefs circulated, policy dialogues held, twitter shares... If the dissemination took place at a dissemination mtg you can add the respective "forum" code. If the dissemination included decision-makers involvement (exc…	Implementation process Implementation
●	Impl process_miscellaneous	Category: Implementation process code: miscellaneous Code description: Use this code for quotations about aspects of the IKT implementation process in CEBHA+ that are not covered under neighouring codes.	Implementation process Implementation
●	IMPL__OUTCOMES	IKT implementation outcomes	Implementation Outcomes Implementation
●	IMPL_ACCEPTABILITY	Category: Implementation outcomes Sub-category: acceptability	Implementation outcomes: Acceptability Implementation Outcomes Implementation
●	Impl_acceptability_appreciation for continuous engagement	Category: Implementation outcomes Sub-category: Acceptability code: Appreciation of the continuous engagement Code description: Use this code for quotations where interview participants stress the relevance of continuous engagement with stakeholders; the quotations will typically indicate a sense of approval of the continuous engagement. Example: "You know having all these approaches done systema…	Implementation outcomes: Acceptability Implementation Outcomes Implementation
●	Impl_acceptability_appreciation for intentionality/formalisation	Category: Implementation outcomes Sub-category: Acceptability code: appreciation for deliberateness, intentionality, formalisation of SH engagement in IKT Participants highlighting their appreciation of the deliberate planning of stakeholder engagement by using the IKT strategy, the intentionality or formalisation or appreciating the guidance through the strategy. Sometimes, the quotation may als…	Implementation outcomes: Acceptability Implementation Outcomes Implementation
●	Impl_acceptability_box-ticking exercise	Category: Implementation outcomes Sub-category: Acceptability code: box-ticking exercise code description: Use this code for quotations about IKT being perceived or discussed as a "box-ticking exericse".	Implementation outcomes: Acceptability
●	Impl_acceptability_engagement pays off	Category: Implementation outcomes Sub-category: Acceptability code: IKT approach pays off Code description: Use this code for quotations where interview participants express the view that stakeholder engagement and/or IKT in CEBHA+ pays off, indicating acceptance of the approach.	Implementation outcomes: Acceptability Implementation Outcomes Implementation
●	Impl_acceptability_enthusiasm about the IKT idea	Category: Implementation outcomes Sub-category: Acceptability code: enthusiastic about the IKT idea Code description: Use this code for quotations where interview participants express their enthusiasm about IKT in CEBHA+ indicating good acceptability. The quotations are likely to center around the IKT idea, that is the idea of continuously engaging prioritised stsakeholders. Use this for very pos…	Implementation outcomes: Acceptability Implementation Outcomes Implementation
●	Impl_acceptability_IKT as a new concept	Category: Implementation outcomes Sub-category: Acceptability code: IKT as a new concept Code description: Use this code for interviewee's reflections about IKT being a new strategy or method or concept that they or their colleagues have only gotten to know through CEBHA or that they are not yet too familiar with; they might say that aspects of IKT such as the formality of the approach are new to…	Implementation outcomes: Acceptability Implementation Outcomes Implementation
●	Impl_acceptability_IKT is non-novel	Category: Implementation outcomes Sub-category: Acceptability code: IKT approach is not novel Code description: Use this code for quotations where interview participants express the view that the IKT approach (or rather stakeholder engagement) is not novel, i.e. that it is something they have been doing all along or sth that they were familiar with under a different name. Example: "20:3 ¶ 22 in S…	Implementation outcomes: Acceptability Implementation Outcomes Implementation
●	impl_acceptability_initial concerns	Category: Implementation outcomes Sub-category: Acceptability code: initial concerns about the IKT approach Code description: Use this code for interviewee's reflections about having initial concerns or doubts about the IKT approach, e.g. bc it was considered as time consuming. The statement may or may not be linked with an explanation that they came to appreciate it more over time. Do not use fo…	Implementation outcomes: Acceptability Implementation Outcomes Implementation
●	Impl_acceptability_interest in IKT eval results	Category: Reflections about the systematic IKT process code: IKT evaluation: interest in results Code description: Use this code for quotations where interview participants express an interest in the results of the IKT evaluation indicating acceptability of the overall idea of evaluting iKT in CEBHA+.	Implementation outcomes: Acceptability
●	Impl_acceptability_lack of RS buy-in	Category: Implementation outcomes Sub-category: Acceptability code: lack of buy-in from CEBHA+ colleagues Code description: Use this code for quotations about CEBHA+ researchers not buying into the IKT approach, indicating low acceptability. This may be stated explicitly or implicitly. Interviewees may state that some people liked, some didn't like the approach. This could also include quotations…	Implementation outcomes: Acceptability Implementation Outcomes Implementation
●	Impl_acceptability_miscellaneous: negative/critical	Category: Implementation outcomes Sub-category: Acceptability code: critical of the systematic IKT approach Code description: Use this code for quotations where interview participants express their criticism of the systematic IKT approach, that are not covered under neighbouring codes. For scepticism regarding the impact of the approach, use the respective impact code.	Implementation outcomes: Acceptability
●	Impl_acceptability_miscellaneous: positive	Category: Implementation outcomes Sub-category: Acceptability code: miscellaneous, positive Use this code for quotations indicating acceptance and positive views of IKt or the broader IKT idea of continuous stakeholder engaegment in CEBHA+ that are not covered under neighbouring codes.	Implementation outcomes: Acceptability Implementation Outcomes Implementation
●	Impl_acceptability_too formalised	Category: Implementation outcomes Sub-category: Acceptability code: too formalised Code description: Use this code for quotations where interview participants express the view that the IKT approach in CEBHA+ was too formalised, e.g. the planned extent of monitoring too burdensome.	Implementation outcomes: Acceptability Implementation Outcomes Implementation
●	IMPL_ADOPTION	Category: Implementation outcomes Sub-category: adoption	Implementation outcomes: Adoption Implementation Outcomes Implementation
●	Impl_adoption_IKT idea_no	Category: Implementation outcomes Sub-category: Adoption Sub-sub-category: IKT idea code: no Use this code for quotations that indicate that the IKT idea was not adopted in CEBHA+. Adoption is understood as the "initial implementation", "intention to try". Use this code for quotations indicating that CEBHA+ researchers did not adopt the "IKT idea" and did not seek to engage with decision-makers i…	Implementation outcomes: Adoption Implementation Outcomes Implementation
●	Impl_adoption_IKT idea_yes	Category: Implementation outcomes Sub-category: Adoption Sub-sub-category: IKT idea code: yes Use this code for quotations that indicate that the IKT idea was adopted in CEBHA+. Adoption is understood as the "initial implementation", "intention to try". Use this code for quotations indicating that CEBHA+ researchers adopted the "IKT idea" and sought to engage with decision-makers continuously thr…	Implementation outcomes: Adoption Implementation Outcomes Implementation
●	Impl_adoption_syst IKT_no	Category: Implementation outcomes Sub-category: Adoption Sub-sub-category: systematic IKT approach code: no Use this code for quotations that indicate that the systematic IKT approach was not adopted in CEBHA+. Adoption is understood as the "initial implementation", "intention to try". The systematic approach includes systematic mapping of decision-makers, power analysis, team deliberations about…	Implementation outcomes: Adoption Implementation Outcomes Implementation
●	Impl_adoption_syst IKT_yes	Category: Implementation outcomes Sub-category: Adoption Sub-sub-category: systematic IKT approach code: yes Use this code for quotations that indicate that the systematic IKT approach was adopted in CEBHA+. Adoption is understood as the "initial implementation", "intention to try". The systematic approach includes systematic mapping of decision-makers, power analysis, team deliberations about th…	Implementation outcomes: Adoption Implementation Outcomes Implementation
●	IMPL_APPROPRIATENESS	Category: Implementation outcomes Sub-category: appropriateness	Implementation outcomes: Appropriateness Implementation Outcomes Implementation
●	Impl_appropriateness_IKT: foreign concept	Category: Implementation outcomes Sub-category: Appropriateness code: foreign concept Code description: Use this code for quotations about perceptions of IKT as a concept that is foreign, i.e. brought from a different context to the African context and therefore maybe not appropriate/suitable. This is not about interviewee's perceptions that it's a new concept, the aspect of its "foreignness" sho…	Implementation outcomes: Appropriateness Implementation Outcomes Implementation
●	Impl_appropriateness_IKT: unclear evidence on KT	Category: Implementation outcomes Sub-category: Appropriateness code: unclear evidence on IKT Use this code for quotations about the lack of or unclear evidence on "what works" in KT, indicating that the approach may not be appropriate. E.g. the interview participant might say that they are unsure if this elaborate approach should be undertaken given the lack of evidence that it impacts on decisi…	Implementation outcomes: Appropriateness Implementation Outcomes Implementation
●	Impl_appropriateness_IKT:miscellaneous	Category: Implementation outcomes Sub-category: Appropriateness code: miscellaneous Use this code for quotations about aspects regarding appropriateness of the systematic IKT approach that are not covered under neighbouring codes. This could include concerns about duplicating efforts that others have undertaken, lack of contextualisation (e.g. not joining forces with existing KT structures in the…	Implementation outcomes: Appropriateness Implementation Outcomes Implementation
●	IMPL_COST	Category: Implementation outcomes Sub-category: cost	Implementation outcomes: Cost Implementation Outcomes Implementation
●	Impl_cost_IKT: budgeting is key	Category: Implementation outcomes Sub-category: Cost Sub-sub-category: budget and resources available for IKT code: unclarity/deliberations/other Code description: Use this code for quotations that refer to the budget or resources required for implementing the systematic IKT approach and/or stakeholder engagement at the CEBHA+ sites. Use this code for quotations about the importance of budgeting …	Implementation outcomes: Cost Implementation Outcomes Implementation
●	Impl_cost_IKT: IKT is expensive	Category: Implementation outcomes Sub-category: Cost Sub-sub-category: budget and resources available for IKT code: IKT is expensive Code description: Use this code for quotations that refer to the budget or resources required for implementing the systematic IKT approach and/or stakeholder engagement at the CEBHA+ sites. Use this code for quotations where participants just say that IKT is expensi…	Implementation outcomes: Cost Implementation Outcomes Implementation
●	Impl_cost_IKT: insufficient resources	Category: Implementation outcomes Sub-category: Cost Sub-sub-category: budget and resources available for IKT code: insufficient Code description: Use this code for quotations that refer to the budget or resources required for implementing the systematic IKT approach and/or stakeholder engagement at the CEBHA+ sites, indicating insufficient budget / resources at the participant's site.	Implementation outcomes: Cost Implementation Outcomes Implementation
●	Impl_cost_IKT: miscellaneous	Category: Implementation outcomes Sub-category: Cost Sub-sub-category: budget and resources available for IKT code: miscellaneous Code description: Use this code for quotations that refer to the budget or resources required for implementing the systematic IKT approach and/or stakeholder engagement at the CEBHA+ sites. Use this code for IKT budget related aspects that are not covered under neighbo…	Implementation outcomes: Cost Implementation Outcomes Implementation
●	Impl_cost_IKT: sufficient resources	Category: Implementation outcomes Sub-category: Cost Sub-sub-category: budget and resources available for IKT code: sufficient Code description: Use this code for quotations that refer to the budget or resources required for implementing the systematic IKT approach and/or stakeholder engagement at the CEBHA+ sites, indicating sufficient resources at the participant's site.	Implementation outcomes: Cost Implementation Outcomes Implementation
●	IMPL_FEASIBILITY	Category: Implementation outcomes Sub-category: feasibility	Implementation outcomes: Feasibility Implementation Outcomes Implementation
●	Impl_feasibility: challenges	Category: Implementation outcomes Sub-category: Feasibility code: challenges Code description: Use this code for quotations about challenges related to feasibility of implementing IKT. Use this code for challenges not addressed under neighbouring codes. Often, you will co-code context-related codes, e.g. staff turnover or project timeline.	Implementation outcomes: Feasibility Implementation Outcomes Implementation
●	Impl_feasibility: complicated concept	Category: Implementation outcomes Sub-category: Feasibility code: IKT concept is very complicated/a lot to take in Code description: Use this code for quotations refering to IKT as a large or complicated concept that took people a bit of time and effort getting used to in order to apply it, which may reduce feasibility of IKT implementation. Can use the code for quotations about people being at d…	Implementation outcomes: Feasibility Implementation Outcomes Implementation
●	Impl_feasibility: conflicting priorities	Category: Implementation outcomes Sub-category: Feasibility code: conflicting priorities Code description: Use this code for quotations that refer to other priorities clashing with IKT work, e.g. de-prioritisation of IKT-related activities compared to other activities, research, administrative, reporting, urgent COVID-related tasks. These other priorities hamper the feasibility of implementing IK…	Implementation outcomes: Feasibility Implementation Outcomes Implementation
●	Impl_feasibility: DM responsiveness	Category: Implementation outcomes Sub-category: Feasibility code: DM responsiveness Code description: Use this code for quotations about researchers being concerned about the potential or actual lack of responsiveness of DMs for conducting SH engagement, which may reduce feasibility of the IKT intervention.	Implementation outcomes: Feasibility Implementation Outcomes Implementation
●	Impl_feasibility: IKT launched late	Category: Implementation outcomes Sub-category: Feasibility code: initiation/launch of IKT occured late in the project phase Code description: Use this code for quotations indicating that the initiation/launch of IKT in CEBHA+ did not occur at the start of the project but rather after some of the first stakeholder engagements had happened at many sites, which may reduce feasibility of IKT impleme…	Implementation outcomes: Feasibility Implementation Outcomes Implementation
●	Impl_feasibility: lack of guidance/support	Category: Implementation outcomes Sub-category: Feasibility code: IKT training: lack of guidance/support Code description: Use this code for quotations that refer to the implementation outcomes of IKT in CEBHA+, in particular the lack of IKT guidance and support as a relevant aspect of feasibility. Use this code for quotations about lack of a written guidance and limited in-person support for imp…	Implementation outcomes: Feasibility Implementation Outcomes Implementation
●	Impl_feasibility: lack of training	Category: Implementation outcomes Sub-category: Feasibility code: lack of training Code description: Use this code for quotations that refer to the implentation outcomes of IKT in CEBHA+, in particular lack of IKT training as relevant aspect of feasibility. This could include quotations about the lack of training for CEBHA+ personnel, the desire for more training, the small number of trainings pr…	Implementation outcomes: Feasibility Implementation Outcomes Implementation
●	Impl_feasibility: misconceptions	Category: Implementation outcomes Sub-category: Feasibility Sub-sub-category: systematic IKT approach code: misconceptions around IKT Code description: Use this code for quotations indicating misconceptions about IKT, that is, quotes reflecting that interviewees do not understand the IKT approach as it was intended. For example, a participant might say that they should have interacted "way more" …	Implementation outcomes: Feasibility Implementation Outcomes Implementation
●	Impl_feasibility: overwhelming DMs	Category: Implementation outcomes Sub-category: Feasibility code: overwhelming DMs Code description: Use this code for quotations researchers being worried about potentially or actually overwhelming decision-makers with the IKT approach, which would reduce feasibility of the IKT approach.	Implementation outcomes: Feasibility Implementation Outcomes Implementation
●	Impl_feasibility: SH engagement takes time	Category: Implementation outcomes Sub-category: Feasibility code: time needed Code description: Use this code for quotations about the amount of time needed for stakeholder engagement as a concern regarding feasibility of implementing the IKT approach	Implementation outcomes: Feasibility Implementation Outcomes Implementation
●	Impl_feasibility: SH engagement: sufficient time	Category: Implementation outcomes Sub-category: Feasibility code: time needed Code description: Use this code for quotations indicating that there is enough time for stakeholder engagement, thus implementation of the IKT approach is feasible.	Implementation outcomes: Feasibility Implementation Outcomes Implementation
●	Impl_feasibility: unrealistic goals of IKT	Category: Implementation outcomes Sub-category: Feasibility code: time needed Code description: Use this code for quotations indicating that the interviewee is concerned abuot IKT and SH engagement goals being unrealistic, which may have implications on feasibility.	Implementation outcomes: Feasibility Implementation Outcomes Implementation
●	IMPL_FIDELITY	Category: Implementation outcomes Sub-category: fidelity	Implementation outcomes: Fidelity Implementation Outcomes Implementation
●	Impl_fidelity_continuous engagement	Category: Implementation outcomes Sub-category: Fidelity code: continuous engagement Use this code for quotations indicated fidelity to the continuous engagement, that is a key aspect of IKT. Use this code for quotations indicating that CEBHA+ researchers worked with DMs at different stages of the research process; and that there were different topics or stages of the engagement. NB The codes und…	Implementation outcomes: Fidelity Implementation Outcomes Implementation
●	Impl_fidelity_deliberations	Category: Implementation outcomes Sub-category: Fidelity code: deliberations code description: Use this code for quotations reflecting strategic deliberations about how certain decision-makers can be engaged, indicating fidelity to the idea of strategic IKT. The deliberations may have taken place among the IKT team or may just come up as sth the interviewee talks about him-/herself, e.g. their re…	Implementation outcomes: Fidelity Implementation Outcomes Implementation
●	Impl_fidelity_engagement undertaken as planned	Category: Implementation outcomes Sub-category: Fidelity code: engagement undertaken as planned code description: Use this code for quotations indicating that engagements were conducted as planned, which reflects fidelity to the IKT approach. This can also be used to describe that an engagement led to the intended outcome, e.g. the South African Minister of Health attending the NCD symposium and …	Implementation outcomes: Fidelity Implementation Outcomes Implementation
●	Impl_fidelity_flexible impl of the IKT strategy	Category: Implementation outcomes Sub-category: Fidelity code: flexible implementation of the IKT strategy code description: Use this code for quotations that describe that a certain degree of flexibility was maintained while implementing the local IKT strategy; these codes may thus reflect that complete adherence to the IKT strategy is not useful... Example: A researcher might describe that the …	Implementation outcomes: Fidelity Implementation Outcomes Implementation
●	Impl_fidelity_no	Category: Implementation outcomes Sub-category: Fidelity code: no Use this code for quotations indicating a lack of fidelity to the IKT approach. You can add this code to other codes. NB The codes under "collaborative research" and "implementation process" also document fidelity to the IKT approach.	Implementation outcomes: Fidelity Implementation Outcomes Implementation
●	Impl_fidelity_yes	Category: Implementation outcomes Sub-category: Fidelity code: yes Use this code for quotations indicating fidelity to the IKT approach. Use this code for aspects not covered under other "fidelity" codes. NB The codes under "collaborative research" and "implementation process" also document fidelity to the IKT approach.	Implementation outcomes: Fidelity Implementation Outcomes Implementation
●	IMPL_PENETRATION	Category: Implementation outcomes Sub-category: penetration Incorporation of IKT in teaching or in other projects (intermediate outcomes) is also indicative of penetration.	Implementation outcomes: Penetration Implementation Outcomes Implementation
●	Impl_penetration: ambiguous	Category: Implementation outcomes Sub-category: Penetration code: ambiguous code description: Use this code for quotations indicating ambiguity regarding the penetration of systematic IKT approach in CEBHA+. Penetration describes the "level of institutionalisation, spread, service access" - in this project it is reflected in how much the IKT approach are taken up by CEBHA+ researchers, e.g. in ne…	Implementation outcomes: Penetration Implementation Outcomes Implementation
●	Impl_penetration: IKT team disconnected	Category: Implementation outcomes Sub-category: Penetration code: IKT personnel - disconnect IKT team Code description: Use this code for quotations describing a disconnect between the IKT team and other researchers or even within the IKT team indicating limited penetration of the approach in the team. E.g. researchers who are not the main IKT focal point may not be aware of what's going on in te…	Implementation outcomes: Penetration Implementation Outcomes Implementation
●	Impl_penetration: IKT team established locally	Category: Implementation outcomes Sub-category: Penetration code: local IKT team established Code description: Use this code for quotations describing that a local IKT team is established and engaged in planning and undertaking IKT activities, indicating some degree of penetration of the systematic IKT approach. This goes beyond one person feeling responsible for IKT at the respective CEBHA+ site…	Implementation outcomes: Penetration Implementation Outcomes Implementation
●	Impl_penetration: institutional support established	Category: Implementation outcomes Sub-category: Penetration code: institutional support established code description: Use this code for quotations that institutional support or structures for IKT were established to support IKT engagements as an indicator of institutional penetration. Penetration describes the "level of institutionalisation, spread, service access" - in this project it is reflect…	Implementation outcomes: Penetration Implementation Outcomes Implementation
●	Impl_penetration: no	Category: Implementation outcomes Sub-category: Penetration code: no Code description: Use this code for quotations showing little or no penetration of the systematic IKT intervention in CEBHA+. You will typically use this code to double-code quotations or for aspects not covered under neighbouring codes. . Penetration describes the "level of institutionalisation, spread, service access" - in thi…	Implementation outcomes: Penetration Implementation Outcomes Implementation
●	Impl_penetration: research perspective centered	Category: Implementation outcomes Sub-category: Penetration code: research perspective centered code description: Use this code for quotations showing that the perspective of researchers predominates in IKT engagements. This indicates limited penetration of the IKT approach. Penetration describes the "level of institutionalisation, spread, service access" - in this project it is reflected in how …	Implementation outcomes: Penetration
●	Impl_penetration: yes	Category: Implementation outcomes Sub-category: Penetration code: yes Code description: Use this code for quotations showing penetration of the systematic IKT intervention in CEBHA+. You will typically use this code to double-code quotations. Use this code for aspects not covered under neighbouring codes. The aspect of penetration goes beyond initial adoption of the approach and also implies a pe…	Implementation outcomes: Penetration Implementation Outcomes Implementation
●	IMPL_SUSTAINABILITY	Category: Implementation outcomes Sub-category: sustainability	Implementation outcomes: Sustainability Implementation Outcomes Implementation
●	Impl_sustainability: hopeful for positive impact	Category: Implementation outcomes Sub-category: sustainability code: hopeful/positive for long-term impact Code description: Use this code for quotations where interview participants reflect about the possible long-term impact of the IKT intervention and express their view that there will likely be a positive long-term impact for EIDM, for example increased consideration of research evidence in h…	Implementation outcomes: Sustainability Implementation Outcomes Implementation
●	Impl_sustainability: sceptical of pos impact	Category: Implementation outcomes Sub-category: Sustainability code: sceptical/no/negative regarding long-term impact Code description: Use this code for quotations where interview participants reflect about the possible long-term impact of the IKT intervention and express their view that there will likely be a negative or no long-term impact on EIDM, e.g. that there will be no effect on evidence…	Implementation outcomes: Sustainability Implementation Outcomes Implementation
●	IMPLEMENTATION	Implementation categories and codes	Implementation
●	INTERMED. OUTCOMES	Main category: Use the codes in this category for quotations where interviewees refer to intermediate outcomes of the IKT intervention. These outcomes would be further downstream than the 4 direct intervention outcomes: relationships, collaborative research, capacity building and partnership building which have their own categories (consult programme theory if needed).	Intermediate outcomes
●	Intermed. outcomes: applicability of CEBHA+ research_ambiguous	Category: Intermediate outcomes Code: applicability of CEBHA+ research: ambiguous Code description: Use this code for quotations describing that the applicability of CEBHA+ research evidence is ambiguous or unclear, i.e. it is uncertain whether the research topics are relevant for policy or practice. If relevant research products have already been produced you can add the respective code.	Intermediate outcomes
●	Intermed. outcomes: applicability of CEBHA+ research_good	Category: Intermediate outcomes Code: applicability of CEBHA+ research: good Code description: Use this code for quotations describing that the applicability of CEBHA+ research evidence is good, i.e. the research topics are relevant for policy or practice. If relevant research products have already been produced you can add the respective code.	Intermediate outcomes
●	Intermed. outcomes: applicability of CEBHA+ research_not good	Category: Intermediate outcomes Code: applicability of CEBHA+ research: not good Code description: Use this code for quotations describing that the applicability of CEBHA+ research evidence is not good, i.e. the research topics are not relevant for policy or practice.	Intermediate outcomes
●	Intermed. outcomes: attitudes_DM 1: interest in research results	Category: Intermediate outcomes Code: DM interest in research results Code description: Use this code for quotations quotations describing that decision-makers have expressed an interest in research evidence (from CEBHA+ or other research evidence) as a consequence of engaging with CEBHA+ researchers. This may inlucde increased appreciation (valuing) of research evidence as well. If the interest …	Intermediate outcomes
●	Intermed. outcomes: attitudes_DM 2: intention to use research	Category: Intermediate outcomes Code: DM intention to use research Code description: Use this code for quotations describing that decision-makers have the intention to consider research evidence as a consequence of engaging with CEBHA+ researchers. This also applies to other stakehodlers (i.e. not only decision-makers, this could be other researchers as well) considering CEBHA+ research OR other …	Intermediate outcomes
●	Intermed. outcomes: attitudes_DM 3: consideration of research	Category: Intermediate outcomes Code: DM consideration of research Code description: Use this code for quotations describing that decision-makers have considered research evidence as a consequence of engaging with CEBHA+ researchers. This also applies to other stakehodlers (i.e. not only decision-makers, this could be other researchers as well) considering CEBHA+ research OR other research eviden…	Intermediate outcomes
●	Intermed. outcomes: attitudes_DM desiring future collaboration	Category: Intermediate outcomes Code: Decision-makers desiring (future) collaboration Code description: Use this code for quotations where decision-makers state their interest for future or deepened collaboration is expressed or where they emphasise the relevance/need of researchers and decision-makers interacting; it could be expressed from both decision-makers themselves or from researchers If …	Intermediate outcomes
●	Intermed. outcomes: attitudes_RS desiring future collaboration	Category: Intermediate outcomes Code: researchers desiring future collaboration Code description: Quotations about researcher interest in future collaboration with stakeholders/decision-makers or generally increased interest in working with professionals from the policy or practice realm as an intermediate outcome of the intervention. (this code is currently under-used)	Intermediate outcomes
●	Intermed. outcomes: further projects conducted	Category: Intermediate outcomes Code: further projects conducted Code description: Use this code for quotations quotations describing that new/further research or other projects where conducted due to the research collaboration, e.g. new sub-project like the crash data system in Uganda or submission of a joint research proposal. If the quotation is only about an interest in future collaboration/n…	Intermediate outcomes
●	Intermed. outcomes: IKT in other projects	Category: Intermediate outcomes Code: IKT in other projects Code description: Use this code for quotations describing that the IKT approach was taken up in other research projects or in teaching; or that interview participants felt inspired to continue using the approach. Add the "hopeful for pos impact" code if the statement is mainly rooted in the interviewee's hope that this intermediate outco…	Intermediate outcomes
●	Intermed. outcomes: miscellaneous	Category: Intermediate outcomes Code: miscellaneous Code description: Use this code for intermediate outcomes that are not covered by other codes.	Intermediate outcomes
●	Intermed. outcomes: relevant evidence/outputs produced_no	Category: Intermediate outcomes Code: relevant evidence our outputs produced: no Code description: Use this code for quotations describing that the IKT approach did not lead to the production of relevant evidence. E.g. research topics may have been chosen in collaboration with decision-makers BUT by the time the research is conducted it is no longer relevant.	Intermediate outcomes
●	Intermed. outcomes: relevant evidence/outputs produced_yes	Category: Intermediate outcomes Code: relevant evidence or outputs produced: yes Code description: Use this code for quotations describing that the IKT approach did lead to the production of relevant evidence or outputs, e.g. policy briefs.	Intermediate outcomes
●	IO_CAP-BUILDING	Main category: Intervention outcomes Sub-category: Capacity-Building Use the codes in this category for quotations about intervention outcomes. These are proximal outcomes of implementing the intervention including capacity-building (this sub-category), relationship-building, collaborative research and partnership-building (neighboring sub-categories). Use the codes in this sub-category for quota…	Intervention outcomes: capacity-building
●	io_cap-building: access to information	Category: Intervention outcomes Sub-category: Capacity-building Code: access to information Code description: Use this code for quotations describing improved access to information, data, evidence, or other resources as a direct effect of the intervention (SH engagement/IKT), for either the decision-making partner or the researcher. Use this code only for activities that have taken place, not for…	Intervention outcomes: capacity-building
●	io_cap-building: capacity for collab_IKT strategy = tool	Category: Intervention outcomes Sub-category: Capacity-building Code: IKT strategy seen as a tool Code description: Use this code for quotations indicating IKT-related capacity-building: Interviewees understanding the IKT strategy as a tool.	Intervention outcomes: capacity-building
●	io_cap-building: capacity for collab_RS understanding of DM	Category: Intervention outcomes Sub-category: Capacity-building Sub-sub-category: capacity for collaboration Code: RS understanding of the DM "world" Code description: Use this code for quotations describing that the intervention improved researchers' capacity to participate in a collaborative research project in the future, particularly through a better understanding of the realities and practic…	Intervention outcomes: capacity-building
●	io_cap-building: capacity for collab_skills	Category: Intervention outcomes Sub-category: Capacity-building Sub-sub-category: capacity for collaboration Code: skills Code description: Use this code for quotations describing that the intervention improved researchers' or decision-makers' capacity to participate in a collaborative research project in the future. This relates to the skills they have acquired to do this, e.g. identifying appro…	Intervention outcomes: capacity-building
●	io_cap-building: capacity for collab_unspecific/understanding	Category: Intervention outcomes Sub-category: Capacity-building Sub-sub-category: capacity for collaboration Code: unspecific/understanding Code description: Use this code for quotations describing that the intervention improved researchers' or decision-makers' capacity to participate in a collaborative research project in the future. Use this code for unspecific collaborative capacities that wer…	Intervention outcomes: capacity-building
●	io_cap-building: joint training_conference	Category: Intervention outcomes Sub-category: Capacity-building Sub-sub-category: joint training Code: conference Code description: Use this code for quotations relating to outcomes of implementing the CEBHA+ IKT/stakeholder engagement approach ("the intervention") that describe capacity-building among interviewees or their CEBHA+ colleagues or partners: when researchers and their DM partners fro…	Intervention outcomes: capacity-building
●	io_cap-building: joint training_EIDM/EtP/EBPH	Category: Intervention outcomes Sub-category: Capacity-building Sub-sub-category: joint training Code: EIDM/EtP/EBPH training Code description: Use this code for quotations relating to outcomes of implementing the CEBHA+ IKT/stakeholder engagement approach ("the intervention") that describe capacity-building among interviewees or their CEBHA+ colleagues or partners: when researchers and their DM …	Intervention outcomes: capacity-building
●	io_cap-building: joint training_not specified/other	Category: Intervention outcomes Sub-category: Capacity-building Sub-sub-category: joint training Code: not specified/other Code description: Use this code for quotations relating to outcomes of implementing the CEBHA+ IKT/stakeholder engagement approach ("the intervention") that describe capacity-building among interviewees or their CEBHA+ colleagues or partners: when researchers and their DM par…	Intervention outcomes: capacity-building
●	io_cap-building: joint training_SR course	Category: Intervention outcomes Sub-category: Capacity-building Sub-sub-category: joint training Code: SR course Code description: Use this code for quotations relating to outcomes of implementing the CEBHA+ IKT/stakeholder engagement approach ("the intervention") that describe capacity-building among interviewees or their CEBHA+ colleagues or partners: when researchers and their DM partners from…	Intervention outcomes: capacity-building
●	io_cap-building: miscellaneous	Category: Intervention outcomes Sub-category: Capacity-building Code: miscellaneous Code description: Use this code for quotations relating to outcomes of implementing the CEBHA+ IKT/stakeholder engagement approach ("the intervention") that describe capacity-building among interviewees or their CEBHA+ colleagues or partners: use this for aspects that are not yet covered under the other capacity-b…	Intervention outcomes: capacity-building
●	io_cap-building: new contacts	Category: Intervention outcomes Sub-category: capacity building Code: new contacts Code description: Use this code for quotations that refer to new contacts as capacity building-related intervention outcomes. This could include new contacts that help to realise project/research aims or that can be useful in the future	Intervention outcomes: capacity-building
●	io_cap-building: new perspective gained	Category: Intervention outcomes Sub-category: capacity-building Code: new perspective Code description: Use this code for quotations about partners in the research collaboration gaining a new perspective as an intervention outcome, e.g. a stakeholder or researcher reporting that they gained a new understanding through the partnership. This can also include quotations where interview participants …	Intervention outcomes: capacity-building
●	io_cap-building: new skills	Category: Intervention outcomes Sub-category: Capacity-building Code: New research or other skills Code description: Use this code for segments relating to outcomes of implementing the CEBHA+ IKT/stakeholder engagement approach ("the intervention") that describe that interviewees or their CEBHA+ partners gained new researchs or other skills through the project. Don't use this for (I)KT- or EIDM-r…	Intervention outcomes: capacity-building
●	io_cap-building: none/not achieved/neg	Category: Intervention outcomes Sub-category: Capacity-building Code: none/not achieved Code description: Use this code for quotations describing that no capacity-building happened, that a capacity building goal was not achieved, or other negative outcome related to capacity-building.	Intervention outcomes: capacity-building
●	IO_COLLAB_RESEARCH	Main category: Intervention outcomes Sub-category: Collaborative research Use the codes in this category for quotations about intervention outcomes. These are proximal outcomes of implementing the intervention including collaborative research (this sub-category), relationship-building, capacity-building and partnership-building (neighboring sub-categories). Use the codes in this sub-category for …	Intervention outcomes: collaborative research
●	io_collab_research: 1_choosing research topic (broad): no	Category: Intervention outcomes Sub-category: Collaborative research Code: choosing the research topic (broad) - no Code description: Use this code for quotations relating to outcomes of implementing the CEBHA+ IKT/stakeholder engagement approach ("the intervention") that describe that policy-and-practice partners did not participate in activities that helped shape the research topic, i.e. priori…	Intervention outcomes: collaborative research
●	io_collab_research: 1_choosing research topic (broad): yes	Category: Intervention outcomes Sub-category: Collaborative research Code: choosing the research topic (broad) - yes Code description: Use this code for quotations relating to outcomes of implementing the CEBHA+ IKT/stakeholder engagement approach ("the intervention") that describe that policy-and-practice partners participated in activities that helped shape the research topic, i.e. priority-set…	Intervention outcomes: collaborative research
●	io_collab_research: 2_defining research question or methods: no	Category: Intervention outcomes Sub-category: Collaborative research Code: defining the research question and methods - no Code description: Use this code for quotations relating to outcomes of implementing the CEBHA+ IKT/stakeholder engagement approach ("the intervention") that describe that policy-and-practice partners did not participate in activities that helped define the actual research que…	Intervention outcomes: collaborative research
●	io_collab_research: 2_defining research question or methods: yes	Category: Intervention outcomes Sub-category: Collaborative research Code: defining the research question and methods - yes Code description: Use this code for quotations relating to outcomes of implementing the CEBHA+ IKT/stakeholder engagement approach ("the intervention") that describe that policy-and-practice partners participated in activities that helped define the actual research question,…	Intervention outcomes: collaborative research
●	io_collab_research: 3a_joint data collection: no	Category: Intervention outcomes Sub-category: Collaborative research Code: joint data collection - no Code description: Use this code for quotations relating to outcomes of implementing the CEBHA+ IKT/stakeholder engagement approach ("the intervention") that describe that policy-and-practice partners did not participate in joint data collection activities. NB this code also signals (non-)adoption…	Intervention outcomes: collaborative research
●	io_collab_research: 3a_joint data collection: yes	Category: Intervention outcomes Sub-category: Collaborative research Code: joint data collection - yes Code description: Use this code for quotations relating to outcomes of implementing the CEBHA+ IKT/stakeholder engagement approach ("the intervention") that describe that policy-and-practice partners did participate in joint data collection activities. For decision-makers that facilitated data c…	Intervention outcomes: collaborative research
●	io_collab_research: 3b_facilitated data collection: no	Category: Intervention outcomes Sub-category: Collaborative research Code: facilitated data collection - no Code description: Use this code for quotations relating to outcomes of implementing the CEBHA+ IKT/stakeholder engagement approach ("the intervention") that describe that policy-and-practice partners did not facilitate data collection, i.e. their approval was needed in order to start data c…	Intervention outcomes: collaborative research
●	io_collab_research: 3b_facilitated data collection: yes	Category: Intervention outcomes Sub-category: Collaborative research Code: facilitated data collection - yes Code description: Use this code for quotations relating to outcomes of implementing the CEBHA+ IKT/stakeholder engagement approach ("the intervention") that describe that policy-and-practice partners were instrumental in facilitating data collection, i.e. their approval was needed in order…	Intervention outcomes: collaborative research
●	io_collab_research: 4_data analysis: no	Category: Intervention outcomes Sub-category: Collaborative research Code: joint data analysis - no Code description: Use this code for quotations relating to outcomes of implementing the CEBHA+ IKT/stakeholder engagement approach ("the intervention") that describe that policy-and-practice partners did not participate in data analysis. NB this code also signals (non-)adoption of the systematic IK…	Intervention outcomes: collaborative research
●	io_collab_research: 4_data analysis: yes	Category: Intervention outcomes Sub-category: Collaborative research Code: joint data analysis - yes Code description: Use this code for quotations relating to outcomes of implementing the CEBHA+ IKT/stakeholder engagement approach ("the intervention") that describe that policy-and-practice partners did participate in data analysis. Use this code only for activities that have taken place, not for…	Intervention outcomes: collaborative research
●	io_collab_research: 5_data interpretation: no	Category: Intervention outcomes Sub-category: Collaborative research Code: joint data interpretation - no Code description: Use this code for quotations relating to outcomes of implementing the CEBHA+ IKT/stakeholder engagement approach ("the intervention") that describe that policy-and-practice partners did not participate in data interpretation. NB this code also signals (non-)adoption of the s…	Intervention outcomes: collaborative research
●	io_collab_research: 5_data interpretation: yes	Category: Intervention outcomes Sub-category: Collaborative research Code: joint data interpretation - yes Code description: Use this code for quotations relating to outcomes of implementing the CEBHA+ IKT/stakeholder engagement approach ("the intervention") that describe that policy-and-practice partners did participate in data interpretation; i.e. preliminary results were presented to them and …	Intervention outcomes: collaborative research
●	io_collab_research: 6_(scientific) publication/reporting: no	Category: Intervention outcomes Sub-category: Collaborative research Code: joint publishing/reporting - no Code description: Use this code for quotations relating to outcomes of implementing the CEBHA+ IKT/stakeholder engagement approach ("the intervention") that describe that policy-and-practice partners did not participate in the publication of research results. NB this code also signals (non-)…	Intervention outcomes: collaborative research
●	io_collab_research: 6_(scientific) publication/reporting: yes	Category: Intervention outcomes Sub-category: Collaborative research Code: joint publishing/reporting - yes Code description: Use this code for quotations relating to outcomes of implementing the CEBHA+ IKT/stakeholder engagement approach ("the intervention") that describe that policy-and-practice partners did participate in the publication of research results; this could be happening through co-…	Intervention outcomes: collaborative research
●	io_collab_research: 7_dissemination: no	Category: Intervention outcomes Sub-category: Collaborative research Code: joint dissemination - no Code description: Use this code for quotations relating to outcomes of implementing the CEBHA+ IKT/stakeholder engagement approach ("the intervention") that describe that policy-and-practice partners did not participate in dissemination activities: after research outputs have been produced (for exa…	Intervention outcomes: collaborative research
●	io_collab_research: 7_dissemination: yes	Category: Intervention outcomes Sub-category: Collaborative research Code: joint dissemination - yes Code description: Use this code for quotations relating to outcomes of implementing the CEBHA+ IKT/stakeholder engagement approach ("the intervention") that describe that policy-and-practice partners did participate in dissemination activities: after research outputs have been produced (for exampl…	Intervention outcomes: collaborative research
●	io_collab_research: 8_implementation of results: no	Category: Intervention outcomes Sub-category: Collaborative research Code: implementation of results: no Code description: Use this code for quotations relating to outcomes of implementing the CEBHA+ IKT/stakeholder engagement approach ("the intervention") that describe that policy-and-practice partners who received actionable scientific recommendations and who were in a position to act on those …	Intervention outcomes: collaborative research
●	io_collab_research: 8_implementation of results: yes	Category: Intervention outcomes Sub-category: Collaborative research Code: implementation of results: yes Code description: Use this code for quotations relating to outcomes of implementing the CEBHA+ IKT/stakeholder engagement approach ("the intervention") that describe that policy-and-practice partners who received actionable scientific recommendations and who were in a position to act on those…	Intervention outcomes: collaborative research
●	io_collab_research: 9_miscellaneous	Category: Intervention outcomes Sub-category: Collaborative research Code: miscellaneous Code description: Use this code for quotations relating to outcomes of implementing the CEBHA+ IKT/stakeholder engagement approach ("the intervention") that have not yet been covered under the other codes referring to collaborative research outcomes, e.g. working collaboratively on policy briefs, issue briefs…	Intervention outcomes: collaborative research
●	IO_PARTNERSHIP	Main category: Intervention outcomes Sub-category: Relationships Use the codes in this category for quotations about intervention outcomes. These are direct outcomes of implementing the intervention including partnership-building (this sub-category), capacity-building, collaborative research and relationship-building (neighboring sub-categories).	Intervention outcomes: partnership
●	io_partnership: boundary spanners	Category: Intervention outcomes Sub-category: partnership Code: boundary spanners Code description: Quotations about CEBHA+ efforts resulting in setting up individuals as "boundary spanners" who have a role in both the research and a policy institution (e.g. MoH) or someone who has worked in one institution and then changed into the other institution. e.g. PhD students within Rwanda Biomedical Ce…	Intervention outcomes: partnership
●	io_partnership: DM "part of the team"	Category: Intervention outcomes Sub-category: partnership Code: DM part of the team Code description: Use this code for quotations that refer to decision-makers or other stakeholders becoming "part of the research team". Interviewees will often choose these exact words. The code also applies for instances of decision-makers demonstrating or developing ownership of the research project and/or (str…	Intervention outcomes: partnership
●	io_partnership: reciprocal support & mutual benefit	Category: Intervention outcomes Sub-category: partnership Code: reciprocal support & mutual benefit Code description: Use this code for quotations that refer to researchers and DMs having established a partnership where both parties offer support, assistance or help to the other, or where it's a give and take between the two parties and a mutual benefit arises; might include quotations about alig…	Intervention outcomes: partnership
●	io_partnership_directionality_DM initiative	Category: Intervention outcomes Sub-category: partnership Code: directionality: DM initiative Code description: Use this code for quotations describing that decision-makers (or other stakeholders) initiated the contact with CEBHA+ researchers OR organised a meeting OR requested evidence OR initiated a joint project etc. This may include instances where interview participants describe that researc…	Intervention outcomes: partnership
●	io_partnership_MoU/formal partnership	Category: Intervention outcomes Sub-category: partnership Code: MoU or formal partnership established Code description: Use this code for quotations about partnerships that were established with an MoU or other formal document or contract signed by researchers and their partners.	Intervention outcomes: partnership
●	io_partnership_yes	Category: Intervention outcomes Sub-category: partnership Code: yes Code description: Use this code for quotations about successfully established, maintained, or strengthened partnerships between researchers and their DM partners. This code can also be used for statements about the partnership being established but informal. If an MoU was signed use the respective code.	Intervention outcomes: partnership
●	IO_RELATIONSHIPS	Main category: Intervention outcomes Sub-category: Relationships Use the codes in this category for quotations about intervention outcomes. These are direct outcomes of implementing the intervention including relationship-building (this sub-category), capacity-building, collaborative research and partnership-building (neighboring sub-categories). Use the codes in this sub-category for quotations …	Intervention outcomes: relationships
●	io_relationships: appreciation	Category: Intervention outcomes Sub-category: relationships Code: appreciation Code description: Use this code for quotations indicating that the decision-makers or other stakeholders appreciated the involvement / collaborative research.	Intervention outcomes: relationships
●	io_relationships: change in attitudes towards research / policy-and-practice	Category: Intervention outcomes Sub-category: relationships Code: change in attitudes towards research / policy-and-practice Code description: Use this code for quotations indicating that the IKT intervention led to changed attitudes of researchers (towards policy and practice) or of decision-makers (towards research or using evidence in DM). Co-code with individual context codes.	Intervention outcomes: relationships
●	io_relationships: miscellaneous_negative	Category: Intervention outcomes Sub-category: relationships Code: miscellaneous, negative Code description: Use this code for quotations about negative relationship-related intervention outcomes that are not covered under the other codes in this sub-category. These negative/harmful outcomes with respect to researcher-decison-maker relationships could include instances where interview participants…	Intervention outcomes: relationships
●	io_relationships: miscellaneous_positive	Category: Intervention outcomes Sub-category: relationships Code: miscellaneous, positive Code description: Use this code for quotations about positive relationship-related intervention outcomes that are not covered under the other codes in this sub-category. This could include interview participants describing that they have a particularly good relationship with each other. Or that their relatio…	Intervention outcomes: relationships
●	io_relationships: mutual understanding	Category: Intervention outcomes Sub-category: relationships Code: mutual understanding Code description: Use this code for quotations indicating that the IKT intervention led to increased understanding of researchers and decision-makers.	Intervention outcomes: relationships
●	io_relationships: none/unsuccessful	Category: Intervention outcomes Sub-category: relationships Code: none Code description: Use this code for quotations that indicate that no relationship with a decision-maker was established or that efforts to establish a relationship failed.	Intervention outcomes: relationships
●	io_relationships: personal connection DM-RS	Category: Intervention outcomes Sub-category: relationships Code: personal connection DM-RS Code description: Use this code for quotations that refer to researchers and DMs having a close working relationship that they consider quite personal, this might be something they say explicitly or could be evident from the context of the quotation, i.e. when they have each other's whatsapp number and can…	Intervention outcomes: relationships
●	io_relationships: trust/respect	Category: Intervention outcomes Sub-category: relationships Code: trust/respect Code description: Use this code for quotations about trust, respect, appreciation and admiration as intervention outcomes.	Intervention outcomes: relationships
●	io_relationships: visibility of the institution/research	Category: Intervention outcomes Sub-category: relationships Code: visibility of the institution or research Code description: Use this code for quotations indicating that the IKT intervention led to more visibility of the institution or research, e.g. "putting research on the radar", introducing DMs to researchers and research happening at the institution....	Intervention outcomes: relationships
●	OUTCOMES: OTHER/UNINTENDED	Main category: Intervention effects other than the main aim of the intervention (which is improved evidence use in decision-making, enhanced EIDM, better contextualisation of research evidence...)	Outcomes: other/unintended effects
●	Outcomes: unintended_neg/harmful effects: conflicts	Category: other and unintended outcomes Sub-category: unintended, negative and harmful effects code: conflicts Code description: Use this code for quotations about harms & negative consequences or aspects linked to the CEBHA+ IKT intervention, that is unintended negative consequences or other effects. Use this particular code for explicit or implicit references to conflicts sparked through/associ…	Outcomes: other/unintended effects
●	Outcomes: unintended_neg/harmful effects: miscellaneous	Category: other and unintended outcomes Sub-category: unintended, negative and harmful effects code: miscellaneous Code description: Use this code for quotations about harms & negative consequences or aspects linked to the CEBHA+ IKT intervention, that is unintended negative consequences or other effects. Use this particular code for aspects not covered under neighbouring codes. Do not use for: P…	Outcomes: other/unintended effects
●	Outcomes: unintended_neg/harmful effects: opportunity cost	Category: other and unintended outcomes Sub-category: unintended, negative and harmful effects code: opportunity cost Code description: Use this code for quotations about harms & negative consequences or aspects linked to the CEBHA+ IKT intervention, that is unintended negative consequences or other effects. Use this particular code for explicit or implicit references to the opportunity cost asso…	Outcomes: other/unintended effects
●	Outcomes: unintended_neg/harmful effects: pressure on researchers	Category: other and unintended outcomes Sub-category: unintended, negative and harmful effects code: pressure on researchers Code description: Use this code for quotations about harms & negative consequences or aspects linked to the CEBHA+ IKT intervention, that is unintended negative consequences or other effects. Use this particular code for quotations about pressure on researchers as an effect…	Outcomes: other/unintended effects
●	Outcomes: unintended_pos effects/benefits: personally rewarding	Category: other and unintended outcomes Sub-category: unintended positive effects code: personally rewarding Code description: Use this code for quotations about benefits & positive consequences linked to the CEBHA+ IKT intervention. This code should be used for positive intervention effects other than the main aim of the intervention (improved EIDM). Use this particular code for aspects related …	Outcomes: other/unintended effects
●	Outcomes: unintended_pos effects/benefits: training for junior researchers	Category: other and unintended outcomes Sub-category: unintended positive effects code: training for junior researchers Code description: Use this code for quotations about benefits & positive consequences linked to the CEBHA+ IKT intervention. This code should be used for positive intervention effects other than the main aim of the intervention (improved EIDM). Use this particular code for posit…	Outcomes: other/unintended effects
●	Outcomes: unintended_pos effects/benefits:miscellaneous	Category: other and unintended outcomes Sub-category: unintended positive effects code: miscellaneous Code description: Use this code for quotations about benefits & positive consequences linked to the CEBHA+ IKT intervention. This code should be used for positive intervention effects other than the main aim of the intervention (improved EIDM). Use this particular code for aspects not covered und…	Outcomes: other/unintended effects
●	RECOMMENDATIONS		Recommendations
●	recommendations_early engagement	Category: IKT recommendations Code: early engagement Code description: Use this code for quotations with recommendations on how the systematic IKT approach could be improved in a future project - use this code for references to engaging decision-makers early in the project/research process. Example: 'I think what one can say though is that if you go in early enough. and you/ really they can't tal…	Recommendations
●	recommendations_IKT essential	Category: IKT recommendations Code: IKT essential Code description: Use this code for quotations with recommendations on how the systematic IKT approach could be improved in a future project - use this code for statements about the IKT approach being an essential approach in future research.	Recommendations
●	recommendations_IKT initiation	Category: IKT recommendations Code: IKT initiation Code description: Use this code for quotations with recommendations on how the systematic IKT approach could be improved in a future project - use this code for statements about how a systematic IKT approach can be launched/initiated in a project. In particular, interviewees might comment on early provision of IKT training and launching an IKT ap…	Recommendations
●	recommendations_IKT personnel, budget, time	Category: IKT recommendations Code: resources: IKT personnel, budget, time Code description: Use this code for quotations with recommendations on how the systematic IKT approach could be improved in a future project - use this code for references to the need for adequate resources, budgeting, personnel time for undertaking a syst. IKT appraoch.	Recommendations
●	recommendations_IKT training/guidance for RS	Category: IKT recommendations Code: IKT training / guidance Code description: Use this code for quotations with recommendations on how the systematic IKT approach could be improved in a future project - use this code for references to the need for continuous IKT training, more guidance, IKT training for all staff... Occassionally, it may be obvious from the quotation that the IKT training did not…	Recommendations
●	recommendations_IKT/EIDM training for DMs	Category: IKT recommendations Code: IKT or EIDM training for decision-makers Code description: Use this code for quotations with recommendations on how the systematic IKT approach could be improved in a future project - use this code for recommendations to provide a training on IKT or EIDM to decisionmakers. Often it would be proposed to run this training early on in the project to "teach them" w…	Recommendations
●	recommendations_miscellaneous	Category: IKT recommendations Code: miscellaneous Code description: Use this code for quotations with recommendations on how the systematic IKT approach could be improved in a future project - use this code for aspects not covered under the other recommendation codes.	Recommendations
●	recommendations_more deliberate	Category: IKT recommendations Code: more deliberate Code description: Use this code for quotations with recommendations on how the systematic IKT approach could be improved in a future project. Use this code for references to being (even more) deliberate about the stakeholder engagement. E.g. - about the project and collaboration aims (i.e. relevant research topic/aim) in order to identify suitab…	Recommendations
●	recommendations_not just one DM	Category: IKT recommendations Code: not just one DM Code description: Use this code for quotations with recommendations on how the systematic IKT approach could be improved in a future project - use this code for recommendations to engage multiple people within one organisation in order to avoid a loss of contact when one person leaves their position.	Recommendations
●	recommendations_updating/flexibility/openness	Category: IKT recommendations Code: updating/flexibility/openness Code description: Use this code for quotations with recommendations on how the systematic IKT approach could be improved in a future project - use this code for statements about the need to continue updating the IKT strategy, to being flexible and open to new engagements etc. Occassionally, it may be obvious from the quotation that…	Recommendations
●	REFLECTIONS (OTHER)	Main category: reflections Use the codes in this category for participants' reflections about IKT that are not covered under other categories.	Reflections (other)
●	reflections_cross-country exchange	Category: Reflections about the systematic IKT process code: reflections about the cross-country exchange of the IKT team Code description: Use this code for quotations where participants reflect about aspects of the cross-country exchange among the IKT team in CEBHA+, this might include reflections about benefits of the exchange.	Reflections (other)
●	reflections_evaluation_miscellaneous	Category: Reflections about the systematic IKT process code: IKT evaluation: miscellaneous Code description: Use this code for quotations in which interview participants state views about the IKT evaluation that are not covered under other codes.	Reflections (other)
●	reflections_IKT theory	Category: Reflections about the systematic IKT process code: IKT theory Code description: Use this code for quotations about IKT theory, e.g. explicit quotes about the theory behind IKT.	Reflections (other)
○	Z_IMPL: STRATEGIES	Category: implementation strategies of the site-specific IKT strategies in CEBHA+ mechanisms, tools, strategies employed to build the partnership with individual decision-makers // aspects of building the relation-ship	Z_Implementation strategies for individual DMs
○	Z_impl: strategies_appreciation/acknowledgement	Category: implementation strategies of the site-specific IKT strategies in CEBHA+ Code: acknowledgement/appreciation Code description: Use this code for quotations that describe strategies that were used to implement the local IKT strategy and build partnerships with individual decision-makers. Use this code for the following aspects: - By appreciating and acknowledging decision-makers' voice, op…	Z_Implementation strategies for individual DMs
○	Z_impl: strategies_investing in relationship	Category: implementation strategies of the site-specific IKT strategies in CEBHA+ Code: investing in the relationship Code description: Use this code for quotations that describe strategies that were used to implement the local IKT strategy and build partnerships with individual decision-makers. With respect to investing in the relationship this may include the following: - researcher teams delib…	Z_Implementation strategies for individual DMs
○	Z_impl: strategies_negotiating engagement	Category: implementation strategies of the site-specific IKT strategies in CEBHA+ Code: negotiating the terms of the engagement Code description: Use this code for quotations that describe strategies that were used to implement the local IKT strategy and build partnerships with individual decision-makers. Use this code for quotations about the aspect of negotiating and navigating differing or com…	Z_Implementation strategies for individual DMs
○	Z_impl: strategies_persisting	Category: implementation strategies of the site-specific IKT strategies in CEBHA+ Code: persisting Use this code for quotations that describe strategies that were used to implement the local IKT strategy and build partnerships with individual decision-makers. Use this code for interviewee's describing that they were persistent in their efforts to establish a partnership with a decision-maker or t…	Z_Implementation strategies for individual DMs
○	Z_SH ENGAGEMENT PHASES	Main category: phases of stakeholder engagement Use the codes in this category to highlight where specific phases of stakeholder engagement were taking place, irrespective of any mentioning of IKT	Z_SH engagement phases
○	Z_SH engagement phases: 1) establishing the relationship	Category: SH engagement phases Code: establishing the relationship Code description: Use this code for quotations about the early phase of a new (or renewed) stakeholder engagement. This might include sections that cover how relationships with stakeholders were set up/established or should be set up/established; this might also include participant statements about how relationships with stakehold…	Z_SH engagement phases
○	Z_SH engagement phases: 2) maintenance of the relationship	Category: SH engagement phases Code: maintaining the relationship Code description: Use this code for quotations about the maintenance of relationships between researchers and decision-makers. Theoretically, this would apply to any SH engagement activity after the initial phase of starting the relationship. Therefore, in order to keep the data load for this code manageable, this code should only …	Z_SH engagement phases
○	Z_SH engagement phases: 3) low engagement phase	Category: SH engagement phases Code: low engagement Code description: Use this code for quotations about phases were only limited engagement with stakeholders is happening. This might be the case during certain phases of data collection and analysis or whilst waiting for grant approval or might be due to the COVID-19 pandemic. Use this code only when interview participants refer explicitly to eng…	Z_SH engagement phases
○	Z_SH engagement phases: 4) dissolution	Category: SH engagement phases Code: dissolution Code description: Use this code for quotations about the end of a researcher-stakeholder relationship. This might be due to a "natural" process at the end of the project, due to someone changing positions or moving away, or a relationship ending due to a conflict, changed interests etc.	Z_SH engagement phases
○	Z_SH engagement phases: miscellaneous	Category: SH engagement phases Code: miscellaneous Code description: This code might be used for other phases of the researcher-DM partnership, i.e. those not covered by neighbouring codes	Z_SH engagement phases

## Sheet: Coding frame_short overview
	Category	Sub-category	Sub-sub-category	# codes in category	Codes	Code book example(s)
●	Contextual factors	Any/multiple levels	/	1	cntxtl factors: any/multi-level_power	Category: contextual factors sub-category: any, multiple or unspecified levels code: power code description: Use this code for instances when a power difference between interview participants and their partners from policy and practice, between interview participants and the German IKT team, between others within CEBHA+ is mentioned or where power in general is mentioned or alluded to. The aspect…
●	Contextual factors	Any/multiple levels	Pre-existing relationships	3	cntxtl factors: any/multi-level_pre-exist:individual cntxtl factors: any/multi-level_pre-exist:institutional connection cntxtl factors: any/multi-level_pre-exist:similar projects	Category: contextual factors sub-category: any, multiple or unspecified levels sub-sub-category: pre-existing relationships code: similar projects code description: Use this code for participants reporting about pre-existing relationships between research teams and decision-makers, that originate from having worked on similar projects in the past. This is about relationships pre-dating CEBHA+. Us…
●	Contextual factors	Individual / personal level	Attitudes (IKT / EIDM)	6	cntxt: individual: attitudes_KT_interest in networking cntxt: individual: attitudes_KT_interest in research/EIDM cntxt: individual: attitudes_KT interest_no cntxt: individual: attitudes_KT interest_yes cntxt: individual: attitudes_KT_research is often useless/lands on a shelf cntxt: individual: attitudes_KT_separate worlds	Category: contextual factors sub-category: individual / personal level sub-sub-category: IKT / EIDM attitudes code: separate worlds code description: Use this code for quotations about an individual's perception that researchers and those who work in policy or practice operate in different worlds, that work differently, and/or that there are (presumably) different mindsets and ways of working in …
●	Contextual factors	Individual / personal level	Attitudes (personal)	4	cntxt: individual: attitudes_pers_"personality" cntxt: individual: attitudes_pers_hesitancy/suspicion/scepticism cntxt: individual: attitudes_pers_humility cntxt: individual: attitudes_pers_fear of losing face	Category: contextual factors sub-category: individual / personal level sub-sub-category: attitudes (personal) code: hesitancy/suspicion/scepticism code description: Use this code for quotations about (initial) distrust, scepticism, hesitancy or even suspicion of individuals about the research collaboration. Example: "So, I think people are alert for a good reason because you can easily use their …
●	Contextual factors	Individual / personal level	past experience with stakeholder engagement	4	cntxt: individual: experience with SH eng._no cntxt: individual: experience with SH eng._yes_bad cntxt: individual: experience with SH eng._yes_good cntxt: individual: experience with SH eng._yes_neutral	Category: contextual factors sub-category: individual / personal level sub-sub-category: past experience with stakeholder engagement code: none Code description: Use this code for quotations indicating that the interviewee does not have any past experience with SH engagement or that they have had very little exposure to stakeholder engagement thus far. E.g. they have never had to work with people…
●	Contextual factors	Individual / personal level	reason to engage with researchers	8	cntxt: individual_reason_incentives_in kind cntxt: individual_reason_incentives_learning cntxt: individual_reason_incentives_miscellaneous cntxt: individual_reason_incentives_monetary cntxt: individual_reason_mixed/miscellaneous cntxt: individual_reason_personal interest cntxt: individual_reason_position cntxt: individual_reason_public good	Main category: contextual factors Sub-category: individual-level factors Sub-sub-category: reason to engage in researcher-DM partnerships Sub-sub-sub-category: incentives Code: in kind Code description: Use this code for quotations about in kind incentives as a motivation of decision-makers engaging with researchers, e.g. participation in a conference in a nice venue or being able to travel to a …
●	Contextual factors	Individual / personal level	previous KT training	2	cntxt: individual: KT training_yes cntxt: individual: KT training_no	Category: contextual factors sub-category: individual / personal level sub-sub-category: previous KT training code: no code description: Use this code for quotations indicating that an individual had no training on IKT/KT before CEBHA+ started.
●	Contextual factors	Individual / personal level	/	4	cntxt: individual: DM expectations cntxt: individual: miscellaneous cntxt: individual: reputation cntxt: individual: work experience on the "other" side	Category: contextual factors sub-category: individual / personal level code: DM expectations Code description: Use this code for quotations about the decision-maker's expectations that they bring to the partnership as an individual-level factor that may affect stakeholder engagement. Use this code for expectations that are not related to the decisionmaker's motivation or incentives for joining th…
●	Contextual factors	Institutional / organisational level	EIDM/KT capacity or structures	3	cntxtl factors: institution_EIDM/KT capacity or structures_some cntxtl factors: institution_EIDM/KT capacity or structures_substantial cntxtl factors: institution_EIDM/KT capacity_lack of	Category: contextual factors sub-category: institutional / organisational level contextual factors sub-sub-category: EIDM/KT capacity/structures code: some code description: Use this code for quotations about contextual factors at the institutional/organisational level that may affect stakeholder engagement. The instutional / organisation level refers to the level of universities, research instit…
●	Contextual factors	Institutional / organisational level	/	10	cntxtl factors: institution_absorptive capacity cntxtl factors: institution_bureaucracy cntxtl factors: institution_DM priorities/agenda cntxtl factors: institution_hierarchies cntxtl factors: institution_miscellaneous cntxtl factors: institution_reputation/expertise cntxtl factors: institution_resources cntxtl factors: institution_senior staff support cntxtl factors: institution_staff continuity…	1) Category: contextual factors sub-category: institutional / organisational level contextual factors code: absorptive capacity code description: Use this code for quotations about absorptive capacity. The instutional / organisation level refers to the level of universities, research institutions, government, offices, NGOs, etc. This institution may be the respondent's institution or a partner in…
●	Contextual factors	Macro level	Political	6	cntxtl factors: macro__political_climate cntxtl factors: macro__political_election reshuffle (senior level) cntxtl factors: macro__political_factors other than evidence cntxtl factors: macro__political_levels cntxtl factors: macro__political_miscellaneous cntxtl factors: macro__political_policy-implementation gap	1) Category: contextual factors sub-category: macro level sub-sub-category: political factors code: election reshuffle code description: Use this code for quotations about political macro-level contextual factors that may affect stakeholder engagement. Use this specific code for references to (senior) political staff being politically appointed and often changing in the context of elections or on…
●	Contextual factors	Macro level	Research related	8	cntxtl factors: macro__research approval_MoH cntxtl factors: macro__research approval_other SHs cntxtl factors: macro__research funding_for KT cntxtl factors: macro__research funding_foreign funder cntxtl factors: macro__research funding_funder priorities cntxtl factors: macro__research funding_local funding cntxtl factors: macro__research_competition/siloed work cntxtl factors: macro__research_m…	(1) Category: contextual factors sub-category: macro level Sub-sub-category: research related code: MoH or DoH approval code description: Use this code for quotations about regulation of research approval as a macro-level contextual factor that may affect stakeholder engagement. Use this specific code for approval from the Ministry of Health or regional departments, e.g. Western Cape Dept of Heal…
●	Contextual factors	Macro level	Societal	5	cntxtl factors: macro__societal_concern about NCDs cntxtl factors: macro__societal_F2F culture cntxtl factors: macro__societal_miscellaneous cntxtl factors: macro__societal_police	Category: contextual factors sub-category: macro level sub-sub-category: societal factors code: F2F culture code description: Use this code for quotations about societal-level contextual factors that may affect stakeholder engagement. Use this specific code for mentions of face to face culture, i.e. people responding more to face to face interactions, not much to emails... (2) Category: contextua…
●	Contextual factors	Macro level	KT landscape	11	cntxtl factors: macro_KT landscape_DM interest cntxtl factors: macro_KT landscape_EIDM/engagement as lip service cntxtl factors: macro_KT landscape_institutionalised processes cntxtl factors: macro_KT landscape_KT culture/tradition cntxtl factors: macro_KT landscape_KTP cntxtl factors: macro_KT landscape_misalignment cntxtl factors: macro_KT landscape_miscellaneous cntxtl factors: macro_KT landsc…	(1) Category: contextual factors sub-category: macro level sub-sub-category: KT landscape code: DM interest in EIDM, evidence & exchange with researchers code description: Use this code for quotations about the existing knowledge translation landscape as a macro-level contextual factor that may affect stakeholder engagement. This code is used for quotations that describe an ongoing interest of go…
●	Contextual factors	Macro level	/	4	cntxtl factors: macro__economic cntxtl factors: macro__geographic cntxtl factors: macro__language cntxtl factors: macro__miscellaneous	(1) Category: contextual factors sub-category: macro level code: economic factors Code description: Use this code for quotations about economic macro-level contextual factors that may affect stakeholder engagement. This could be related to the funding available for implementing health policy or programmes or state funding for government, state agencies etc... (2) Category: contextual factors sub-…
●	Contextual factors	Project level	Communication	2	cntxtl factors: project_communication_bad cntxtl factors: project_communication_good	Category: contextual factors sub-category: project level sub-sub-category: communication code: bad code description: Use this code for quotations about project-related contextual factors that may affect stakeholder engagement. The project level is understood as the CEBHA+ project and network or specific research tasks within the collaboration. Use this code for references to bad communication or …
●	Contextual factors	Project level	Complex Evidence	2	cntxtl factors: project_complex evidence_no cntxtl factors: project_complex evidence_yes	Category: contextual factors sub-category: project level sub-sub-category: complex evidence code: no code description: Use this code for quotations about the evidence from CEBHA+ or the research topic NOT being perceived as very complex - a project-related contextual factor that may affect stakeholder engagement.
●	Contextual factors	Project level	Complex Project	2	cntxtl factors: project_complex project_no cntxtl factors: project_complex project_yes	Category: contextual factors sub-category: project level code: complex project_no Code description: Use this code for quotations saying that the project is not being perceived as complex - a project-related contextual factor that may affect stakeholder engagement.
●	Contextual factors	Project level	/	7	cntxtl factors: project_conflicts cntxtl factors: project_deliverables cntxtl factors: project_miscellaneous cntxtl factors: project_old CEBHA network cntxtl factors: project_research tasks cntxtl factors: project_South-North aspects cntxtl factors: project_timeline	Category: contextual factors sub-category: project level code: project timeline code description: Use this code for quotations about contextual factors related to the overall project timeline in CEBHA+ that may play a role in shaping stakeholder engagement. The project level is understood as the CEBHA+ project/network and specific research tasks within the collaboration. Use this code for aspects…
●	COVID-19 pandemic	activities	/	4	covid_impact_activity: other/miscellaneous covid_impact_activity: research covid_impact_activity: SH engagement_adhoc covid_impact_activity: SH engagement_IKT/planned	Category: Impact of the COVID-19 pandemic Sub-category: activities affected Code: adhoc SH engagement Code description: Use this code for quotations where participants describe the impact of the COVID-19 pandemic on adhoc SH activities, that is stakeholder engagement that comes up as an opportunity, not pre-planned engagement as detailed in the iKT strategy. In addition to applying this code use …
●		quantity of activities	/	3	covid_impact_quant: less activity covid_impact_quant: more/new activity covid_impact_quant: no change	Category: Impact of the COVID-19 pandemic Sub-category: quantity of activities Code: more activitiy Code description: Use this code for quotations where participants state that a certain activity was undertaken more often during the COVID-19 pandemic or that a new activity was taken up - e.g. more collaboration with stakeholders due to COVID-related consultations, new activity to work on evidence…
○	IKT strategy	components	forum/vehicle	4	IKT strategy_comp__forum/vehicle_dissemination workshop IKT strategy_comp__forum/vehicle_KTP IKT strategy_comp__forum/vehicle_miscellaneous IKT strategy_comp__forum/vehicle_policy dialogue	Category: site-specific IKT Strategy Sub-category: components of the IKT strategy Sub-sub-category: forum/vehicle code: dissemination workshop Code description: Use this code for quotations that describe the components of the stakeholder engagement strategy: The forum or vehicle used or envisioned to engage stakeholders according to the IKT strategy. Use this code for any reference to disseminati…
○	IKT strategy	components	medium	3	IKT strategy_comp__medium_issue brief IKT strategy_comp__medium_miscellaneous IKT strategy_comp__medium_policy brief	Category: site-specific IKT Strategy Sub-category: components of the IKT strategy Sub-sub-category: medium code: policy brief Code description: Use this code for quotations that describe the components of the stakeholder engagement strategy: The medium used or envisioned to engage stakeholders according to the IKT strategy. Use this code for policy briefs. Examples: an interview participant might…
○	IKT strategy	components	main stakeholders	12	IKT strategy_comp_main stakeholders__general IKT strategy_comp_main stakeholders_academic IKT strategy_comp_main stakeholders_communities IKT strategy_comp_main stakeholders_DoH IKT strategy_comp_main stakeholders_healthcare IKT strategy_comp_main stakeholders_local authority IKT strategy_comp_main stakeholders_Ministry_other IKT strategy_comp_main stakeholders_MoH IKT strategy_comp_main stakehol…	(1) Category: site-specific IKT Strategy Sub-category: components of the IKT strategy Sub-sub-category: main stakeholders code: general comments and reflections Code description: Use this code for quotations where interview participants make general comments and reflections about stakeholders without naming a stakeholder explicitly or when the 'category' of stakeholder is not relevant. The partic…
○	IKT strategy	components	/	4	IKT strategy_comp__aim(s) IKT strategy_comp__message IKT strategy_comp__messenger IKT strategy_comp__timing	Category: site-specific IKT Strategy Sub-category: components of the IKT strategy code: message Code description: Use this code for quotations that describe the components of the stakeholder engagement strategy: the message that is planned to convey/conveyed to a certain stakeholder according to the IKT strategy, for example CEBHA+ research goals, research task activities, certain research result…
○	IKT strategy	SH analysis	/	4	IKT strategy_SH analysis: avoider IKT strategy_SH analysis: blocker IKT strategy_SH analysis: champion IKT strategy_SH analysis: silent booster	Category: site-specific IKT Strategy Sub-category: SH analysis Code: champion Code description: Use this code for quotations that describe the power and interest of a stakeholder: someone who has high power and high interest in the topic is a champion. A stakeholder who is very supportive of the research collaboration and is instrumental in supporting CEBHA+ goals. This label can be assigned by a…
●	Implementation agents	/	/	4	Impl agents_IKT team Impl agents_implementing IKT team/staff Impl agents_MUC IKT team Impl agents_SU team	(1) Category: implementation agents Code: cross-country IKT team Code description: Use this code for quotations about the IKT team, that is the group of IKT focal points from all sites and LMU and SU IKT stafff. (2) Category: implementation agents Code: implementing IKT team/staff Code description: Use this code for quotations about the personnel involved in implementing the IKT approach at the f…
●	Implementation process	Planning and preparation	/	3	Impl process_0_engagement bf IKT/project launch Impl process_00_grant writing/prioritisation Impl process_miscellaneous	Category: Implementation process code: engagement before IKT launch Code description: Use this code for quotations about CEBHA+ researchers approaching decision-makers early in the research process and before IKT was formally launched. This may be part of their usual routine of conducting research. For quotations about the recommendation to engage early - use the respective recommendation code.
	Implementation process	Planning and preparation	IKT approach	2	Impl process_1_planning&prep__IKT approach Impl process_1_planning&prep_evaluation	Category: Implementation process Sub-Category: planning & preparation Sub-sub-category: development of the IKT approach for CEBHA+ Code description: Use this code for any quotations describing how the very first step of the implementation process of IKT in CEBHA+ was conducted, that is the development of the IKT approach. Pfadenhauer et al describe this step of exploration as follows: "The first …
●	Implementation process	Planning and preparation	IKT workshop	2	Impl process_1_planning&prep_IKT workshop Cape Town_no Impl process_1_planning&prep_IKT workshop Cape Town_yes	Category: Implementation process Sub-category: planning and preparation Sub-sub-category: IKT workshop attendance Code: no Code description: Use this code for any quotations indicating that someone did not participate in the IKT workshop in Cape Town in 2018.
●	Implementation process	Planning and preparation	IKT post-workshop training	2	Impl process_1_planning&prep_post workshop training of colleagues_no Impl process_1_planning&prep_post workshop training of colleagues_yes	Category: Implementation process Sub-category: planning and preparation Sub-sub-category: IKT training of colleagues Code: no Code description: Use this code for any quotations indicating that CEBHA+ researchers who attended the IKT workshop in Cape Town in 2018 did not convey the workshop content to colleagues at their sites who had not attended the workshop.
●	Implementation process	Stakeholder mapping and analysis	/	2	Impl process_2_SH mapping&analysis: no Impl process_2_SH mapping&analysis: yes	Category: Implementation process Sub-category: SH mapping and analysis Code: yes Code description: Use this code for quotations describing how the stakeholder mapping and analysis was conducted, that is the identification of relevant stakeholders, meetings to find out about possible partners or to gauge DM interest to be engaged, or analysis of DM interest and power as part of the implemenation p…
●	Implementation process	IKT strategy development	/	2	Impl process_3_IKT strategy development: no Impl process_3_IKT strategy development: yes	Category: Implementation process Sub-category: IKT strategy development Code: yes Code description: Use this code for quotations describing how the development of the IKT strategy as part of the implementation process of IKT in CEBHA+ took place. The development of the IKT strategy built upon the SH analysis and mapping, which has its own code. Any reference to the planned engagements as a result…
●	Implementation process	IKT strategy monitoring	/	2	Impl process_4_IKT strategy monitoring_no Impl process_4_IKT strategy monitoring_yes	Category: Implementation process Sub-category: monitoring code: yes Code description: Use this code for quotations describing the monitoring activities undertaken as part of the systematic IKT strategy, e.g. participants indicating that they noted how many decision-makers attended an informal meeting and taking minutes; or documenting the stakeholder engagement. Only use this code for activities …
●	Implementation process	IKT strategy update and maintenance	/	2	Impl process_5_IKT strategy update&maintenance_no Impl process_5_IKT strategy update&maintenance_yes	Category: Implementation process Sub-category: update & maintenance Code: yes Code description: Use this code for quotations describing the continuous updating and maintenance of the IKT strategies. This might include information about the steps that are part of this work, e.g. regular meetings within the local IKT team at one site, deliberations about new stakeholders to include in the engagemen…
●	Implementation process	IKT team activities	/	4	Impl process_6a_IKT team calls Impl process_6b_IKT team training Impl process_6c_IKT team activities_other Impl process_6d_networking mtg	Category: Implementation process Sub-category: IKT team activities code: 6d networking meeting Code description: Use this code for quotations about IKT content at / or IKT aspects related to the networking meeting, e.g. discussion rounds on IKT.
●	Implementation process	IKT activities	/	3	Impl process_7a_informational meetings Impl process_7b_update meetings Impl process_8_dissemination activities	(1) Category: Imlementation process Sub-category: IKT activities Code: update meetings Code description: Use this code for quotations referring to meetings or interactions (could be online meetings or phone calls, too) to maintain relationships between researchers and decision-makers, i.e. follow-up meetings or calls after the project has first been introduced to the stakeholders. The initial mee…
●	Implementation outcomes	Acceptability	/	13	Impl_acceptability_appreciation for continuous engagement Impl_acceptability_appreciation for intentionality/formalisation Impl_acceptability_box-ticking exercise Impl_acceptability_engagement pays off Impl_acceptability_enthusiasm about the IKT idea Impl_acceptability_IKT as a new concept Impl_acceptability_IKT is non-novel impl_acceptability_initial concerns Impl_acceptability_interest in IKT e…	(1) Category: Implementation outcomes | Sub-category: Acceptability code: Appreciation of the continuous engagement Code description: Use this code for quotations where interview participants stress the relevance of continuous engagement with stakeholders; the quotations will typically indicate a sense of approval of the continuous engagement. Example: "You know having all these approaches done s…
●	Implementation outcomes	Adoption	IKT idea	2	Impl_adoption_IKT idea_no Impl_adoption_IKT idea_yes	Category: Implementation outcomes | Sub-category: Adoption Sub-sub-category: IKT idea code: no Code description: Use this code for quotations that indicate that the IKT idea was not adopted in CEBHA+. Adoption is understood as the "initial implementation", "intention to try". Use this code for quotations indicating that CEBHA+ researchers did not adopt the "IKT idea" of continuous engagement with…
●	Implementation outcomes	Adoption	systematic IKT	2	Impl_adoption_syst IKT_no Impl_adoption_syst IKT_yes	Category: Implementation outcomes | Sub-category: Adoption Sub-sub-category: systematic IKT approach code: no Code description: Use this code for quotations that indicate that the systematic IKT approach was not adopted in CEBHA+. Adoption is understood as the "initial implementation", "intention to try". The systematic approach includes systematic mapping of decision-makers, power analysis, team…
●	Implementation outcomes	Appropriateness	/	3	Impl_appropriateness_IKT: foreign concept Impl_appropriateness_IKT: unclear evidence on KT Impl_appropriateness_IKT:miscellaneous	(1) Category: Implementation outcomes | Sub-category: Appropriateness code: foreign concept Code description: Use this code for quotations about perceptions of IKT as a concept that is foreign, i.e. brought from a different context to the African context and therefore maybe not appropriate/suitable. This is not about interviewee's perceptions that it's a new concept, the aspect of its "foreignnes…
●	Implementation outcomes	Cost	/	5	Impl_cost_IKT: budgeting is key Impl_cost_IKT: IKT is expensive Impl_cost_IKT: insufficient resources Impl_cost_IKT: miscellaneous Impl_cost_IKT: sufficient resources	(1) Category: Implementation outcomes | Sub-category: Cost code: budgeting is key Code description: Use this code for quotations that refer to the budget or resources required for implementing the systematic IKT approach and/or stakeholder engagement at the CEBHA+ sites. Use this code for quotations about the importance of budgeting appropriately for IKT activities in advance. (2) code: IKT is ex…
●	Implementation outcomes	Feasibility	/	12	Impl_feasibility: challenges Impl_feasibility: complicated concept Impl_feasibility: conflicting priorities Impl_feasibility: DM responsiveness Impl_feasibility: IKT launched late Impl_feasibility: lack of guidance/support Impl_feasibility: lack of training Impl_feasibility: misconceptions Impl_feasibility: overwhelming DMs Impl_feasibility: SH engagement takes time Impl_feasibility: SH engagemen…	(1) Category: Implementation outcomes | Sub-category: Feasibility code: challenges Code description: Use this code for quotations about challenges related to feasibility of implementing IKT. Use this code for challenges not addressed under neighbouring codes. Often, you will co-code context-related codes, e.g. staff turnover or project timeline. (2) Category: Implementation outcomes | Sub-categor…
●	Implementation outcomes	Fidelity	/	6	Impl_fidelity_continuous engagement Impl_fidelity_deliberations Impl_fidelity_engagement undertaken as planned Impl_fidelity_flexible impl of the IKT strategy Impl_fidelity_no Impl_fidelity_yes	(1) Category: Implementation outcomes | Sub-category: Fidelity code: continuous engagement Code description: Use this code for quotations indicated fidelity to the continuous engagement, that is a key aspect of IKT. Use this code for quotations indicating that CEBHA+ researchers worked with DMs at different stages of the research process; and that there were different topics or stages of the enga…
●	Implementation outcomes	Penetration	/	7	Impl_penetration: ambiguous Impl_penetration: IKT team disconnected Impl_penetration: IKT team established locally Impl_penetration: institutional support established Impl_penetration: no Impl_penetration: research perspective centered Impl_penetration: yes	(1) Category: Implementation outcomes | Sub-category: Penetration code: research perspective centered code description: Use this code for quotations showing that the perspective of researchers predominates in IKT engagements. This indicates limited penetration of the IKT approach. Penetration describes the "level of institutionalisation, spread, service access" - in this project it is reflected i…
●	Implementation outcomes	Sustainability	/	2	Impl_sustainability: hopeful for positive impact Impl_sustainability: sceptical of pos impact	Category: Implementation outcomes | Sub-category: sustainability code: hopeful/positive for long-term impact Code description: Use this code for quotations where interview participants reflect about the possible long-term impact of the IKT intervention and express their view that there will likely be a positive long-term impact for EIDM, for example increased consideration of research evidence in…
●	Intermediate outcomes	Applicability of CEBHA+ research	/	3	Intermed. outcomes: applicability of CEBHA+ research_ambiguous Intermed. outcomes: applicability of CEBHA+ research_good Intermed. outcomes: applicability of CEBHA+ research_not good	Category: Intermediate outcomes | Sub-category: Applicability of CEBHA+ research Code: ambiguous Code description: Use this code for quotations describing that the applicability of CEBHA+ research evidence is ambiguous or unclear, i.e. it is uncertain whether the research topics are relevant for policy or practice. If relevant research products have already been produced you can add the respectiv…
●	Intermediate outcomes	Relevance of CEBHA+ research	/	2	Intermed. outcomes: relevant evidence/outputs produced_no Intermed. outcomes: relevant evidence/outputs produced_yes	Category: Intermediate outcomes | Sub-category: Relevance of CEBHA+ research Code: no Code description: Use this code for quotations describing that the IKT approach did not lead to the production of relevant evidence. E.g. research topics may have been chosen in collaboration with decision-makers BUT by the time the research is conducted it is no longer relevant.
●	Intermediate outcomes	Attitudes	/	5	Intermed. outcomes: attitudes_DM 1: interest in research results Intermed. outcomes: attitudes_DM 2: intention to use research Intermed. outcomes: attitudes_DM 3: consideration of research Intermed. outcomes: attitudes_DM desiring future collaboration Intermed. outcomes: attitudes_RS desiring future collaboration	(1) Category: Intermediate outcomes | Sub-category: attitudes Code: DM interest in research results Code description: Use this code for quotations quotations describing that decision-makers have expressed an interest in research evidence (from CEBHA+ or other research evidence) as a consequence of engaging with CEBHA+ researchers. This may inlucde increased appreciation (valuing) of research evid…
●	Intermediate outcomes	/	/	3	Intermed. outcomes: further collaborative projects conducted Intermed. outcomes: IKT in other projects Intermed. outcomes: miscellaneous	Category: Intermediate outcomes Code: further projects conducted Code description: Use this code for quotations quotations describing that new/further research or other collaborative projects where conducted due to the research collaboration, e.g. new sub-project like the crash data system in Uganda or submission of a joint research proposal. If the quotation is only about an interest in future c…
●	Intervention outcomes	Capacity-building	Capacity for collaboration	4	io_cap-building: capacity for collab_IKT strategy = tool io_cap-building: capacity for collab_RS understanding of DM io_cap-building: capacity for collab_skills io_cap-building: capacity for collab_understanding/unspecific	(1) Category: Intervention outcomes | Sub-category: Capacity-building Sub-sub-category: capacity for collaboration Code: IKT strategy seen as a tool Code description: Use this code for quotations indicating IKT-related capacity-building: Interviewees understanding the IKT strategy as a tool. (2) Code: understanding /unspecific Code description: Use this code for quotations describing that the int…
●	Intervention outcomes	Capacity-building	Joint training activities	3	io_cap-building: joint training_conference io_cap-building: joint training_EIDM/EtP/EBPH io_cap-building: joint training_not specified/other io_cap-building: joint training_SR course	Category: Intervention outcomes | Sub-category: Capacity-building Sub-sub-category: joint training activities Code: EIDM/EtP/EBPH training Code description: Use this code for quotations relating to outcomes of implementing the CEBHA+ IKT approach ("the intervention") that describe capacity-building among interviewees or their CEBHA+ colleagues or partners: when researchers and their DM partners f…
●	Intervention outcomes	Capacity-building	/	6	io_cap-building: access to information io_cap-building: miscellaneous io_cap-building: new contacts io_cap-building: new perspective gained io_cap-building: new research skills io_cap-building: none/not achieved/neg	Category: Intervention outcomes | Sub-category: Capacity-building Code: New research skills Code description: Use this code for segments relating to outcomes of implementing the CEBHA+ IKT approach ("the intervention") that describe that interviewees or their CEBHA+ partners gained new researchs skills through the project. Don't use this for (I)KT or EIDM-related skills which have their own code.
●	Intervention outcomes	Collaborative research	Choosing the research topic (broad)	2	io_collab_research: 1_choosing research topic (broad): no io_collab_research: 1_choosing research topic (broad): yes	Category: Intervention outcomes | Sub-category: Collaborative research Sub-sub-category: choosing the research topic (broad) Code: yes Code description: Use this code for quotations relating to outcomes of implementing the CEBHA+ IKT approach ("the intervention") that describe that policy-and-practice partners participated in activities that helped shape the research topic, i.e. priority-setting …
●	Intervention outcomes	Collaborative research	Defining the research question	2	io_collab_research: 2_defining research question or methods: no io_collab_research: 2_defining research question or methods: yes	Category: Intervention outcomes | Sub-category: Collaborative research Sub-sub-category: defining the research question and methods Code:yes Code description: Use this code for quotations relating to outcomes of implementing the CEBHA+ IKT approach ("the intervention") that describe that policy-and-practice partners participated in activities that helped define the actual research question, i.e. …
●	Intervention outcomes	Collaborative research	Joint data collection	2	io_collab_research: 3a_joint data collection: no io_collab_research: 3a_joint data collection: yes	Category: Intervention outcomes | Sub-category: Collaborative research Sub-sub-category: joint data collection Code: yes Code description: Use this code for quotations relating to outcomes of implementing the CEBHA+ IKT approach ("the intervention") that describe that policy-and-practice partners did participate in joint data collection activities. For decision-makers that facilitated data collec…
●	Intervention outcomes	Collaborative research	Facilitated data collection	2	io_collab_research: 3b_facilitated data collection: no io_collab_research: 3b_facilitated data collection: yes	Category: Intervention outcomes | Sub-category: Collaborative research Sub-sub-category: facilitated data collection Code: yes Code description: Use this code for quotations relating to outcomes of implementing the CEBHA+ IKT approach ("the intervention") that describe that policy-and-practice partners were instrumental in facilitating data collection, i.e. their approval was needed in order to s…
●	Intervention outcomes	Collaborative research	(Scientific) publication/reporting	2	io_collab_research: 4_data analysis: no io_collab_research: 4_data analysis: yes	Category: Intervention outcomes | Sub-category: Collaborative research Sub-sub-category: joint data analysis Code: yes Code description: Use this code for quotations relating to outcomes of implementing the CEBHA+ IKT approach ("the intervention") that describe that policy-and-practice partners did participate in data analysis. Use this code only for activities that have taken place, not for plan…
●	Intervention outcomes	Collaborative research	(Scientific) publication/reporting	2	io_collab_research: 5_data interpretation: no io_collab_research: 5_data interpretation: yes	Category: Intervention outcomes | Sub-category: Collaborative research Sub-sub-category: joint data interpretation Code: yes Code description: Use this code for quotations relating to outcomes of implementing the CEBHA+ IKT approach ("the intervention") that describe that policy-and-practice partners did participate in data interpretation; i.e. preliminary results were presented to them and they …
●	Intervention outcomes	Collaborative research	(Scientific) publication/reporting	2	io_collab_research: 6_(scientific) publication/reporting: no io_collab_research: 6_(scientific) publication/reporting: yes	Category: Intervention outcomes | Sub-category: Collaborative research Sub-sub-category: joint publishing/reporting Code: yes Code description: Use this code for quotations relating to outcomes of implementing the CEBHA+ IKT approach ("the intervention") that describe that policy-and-practice partners did participate in the publication of research results; this could be happening through co-autho…
●	Intervention outcomes	Collaborative research	Dissemination	2	io_collab_research: 7_dissemination: no io_collab_research: 7_dissemination: yes	Category: Intervention outcomes | Sub-category: Collaborative research Sub-sub-category: joint dissemination Code: yes Code description: Use this code for quotations relating to outcomes of implementing the CEBHA+ IKT approach ("the intervention") that describe that policy-and-practice partners did participate in dissemination activities: after research outputs have been produced (for example sci…
●	Intervention outcomes	Collaborative research	Implementation of results	2	io_collab_research: 8_implementation of results: no io_collab_research: 8_implementation of results: yes	Category: Intervention outcomes | Sub-category: Collaborative research Sub-sub-category: implementation of results Code: yes Code description: Use this code for quotations relating to outcomes of implementing the CEBHA+ IKT approach ("the intervention") that describe that policy-and-practice partners who received actionable scientific recommendations and who were in a position to act on those rec…
●	Intervention outcomes	Collaborative research	/	1	io_collab_research: 9_miscellaneous	Category: Intervention outcomes | Sub-category: Collaborative research Code: miscellaneous Code description: Use this code for quotations relating to outcomes of implementing the CEBHA+ IKT approach ("the intervention") that have not yet been covered under the other codes referring to collaborative research outcomes, e.g. working collaboratively on policy briefs, issue briefs, strategic plans or …
●	Intervention outcomes	Partnership	/	6	io_partnership: boundary spanners io_partnership: DM "part of the team" io_partnership: reciprocal support & mutual benefit io_partnership_directionality_DM initiative io_partnership_MoU/formal partnership io_partnership_yes	(1) Category: Intervention outcomes | Sub-category: partnership Code: boundary spanners Code description: Quotations about CEBHA+ efforts resulting in setting up individuals as "boundary spanners" who have a role in both the research and a policy institution (e.g. MoH) or someone who has worked in one institution and then changed into the other institution. e.g. PhD students within Rwanda Biomedi…
●	Intervention outcomes	Relationships	/		io_relationships: appreciation io_relationships: change in attitudes towards research / policy-and-practice io_relationships: miscellaneous_negative io_relationships: miscellaneous_positive io_relationships: mutual understanding io_relationships: none/unsuccessful io_relationships: personal connection DM-RS io_relationships: trust/respect io_relationships: visibility of the institution/research	(1) Category: Intervention outcomes | Sub-category: relationships Code: appreciation Code description: Use this code for quotations indicating that the decision-makers or other stakeholders appreciated the involvement / collaborative research. (2) Category: Intervention outcomes | Sub-category: relationship Code: change in attitudes towards research / policy-and-practice Code description: Use thi…
●	Unintended effects	negative or harmful effects	/	4	Outcomes: unintended_neg/harmful effects: conflicts Outcomes: unintended_neg/harmful effects: miscellaneous Outcomes: unintended_neg/harmful effects: opportunity cost Outcomes: unintended_neg/harmful effects: pressure on researchers	Category: other and unintended effects | Sub-category: unintended, negative and harmful effects code: opportunity cost Code description: Use this code for quotations about harms & negative consequences or aspects linked to the CEBHA+ IKT intervention, that is unintended negative consequences or other effects. Use this particular code for explicit or implicit references to the opportunity cost ass…
●	Unintended effects	positive or benefitial effects	/	3	Outcomes: unintended_pos effects/benefits: personally rewarding Outcomes: unintended_pos effects/benefits: training for junior researchers Outcomes: unintended_pos effects/benefits:miscellaneous	Category: other and unintended outcomes | Sub-category: unintended positive effects code: personally rewarding Code description: Use this code for quotations about benefits & positive consequences linked to the CEBHA+ IKT intervention. This code should be used for positive intervention effects other than the main aim of the intervention (improved EIDM). Use this particular code for aspects relate…
●	Recommendations	/	/	10	recommendations_early DM engagement recommendations_IKT essential recommendations_IKT initiation recommendations_IKT personnel, budget, time recommendations_IKT training/guidance for RS recommendations_IKT/EIDM training for DMs recommendations_miscellaneous recommendations_more deliberate recommendations_not just one DM recommendations_updating/flexibility/openness	(1) Category: IKT recommendations Code: early engagement Code description: Use this code for quotations with recommendations on how the systematic IKT approach could be improved in a future project. Use this code for references to engaging decision-makers early in the project/research process. Example: 'I think what one can say though is that if you go in early enough. and you/ really they can't …
●	Reflections	/	/	3	reflections_cross-country exchange reflections_evaluation_miscellaneous reflections_IKT theory	(1) Category: Reflections about the systematic IKT process code: reflections about the cross-country exchange of the IKT team Code description: Use this code for quotations where participants reflect about aspects of the cross-country exchange among the IKT team in CEBHA+, this might include reflections about benefits of the exchange. (2) code: IKT evaluation: miscellaneous Code description: Use …
○	Implementation strategies	/	/	4	Z_impl: strategies_appreciation/acknowledgement Z_impl: strategies_investing in relationship Z_impl: strategies_negotiating engagement Z_impl: strategies_persisting	Category: implementation strategies of the site-specific IKT strategies in CEBHA+ Code: acknowledgement/appreciation Code description: Use this code for quotations that describe strategies that were used to implement the local IKT strategy and build partnerships with individual decision-makers. Use this code for the following aspects: - By appreciating and acknowledging decision-makers' voice, op…
○	SH engagement phases	/	/	4	Z_SH engagement phases: 1) establishing the relationship Z_SH engagement phases: 2) maintenance of the relationship Z_SH engagement phases: 3) low engagement phase Z_SH engagement phases: 4) dissolution Z_SH engagement phases: miscellaneous	Category: SH engagement phases Code: establishing the relationship Code description: Use this code for quotations about the early phase of a new (or renewed) stakeholder engagement. This might include sections that cover how relationships with stakeholders were set up/established or should be set up/established; this might also include participant statements about how relationships with stakehold…

## Sheet: Info
Title:	ATLAS.ti - Code Report
Project:	IKT eval
User:	Kerstin Sell
Date:	12.06.2023 - 15:54:44
